# Supplementary material for: Mono-, Bis-, and Tris-Chelate Zn(II) Complexes with Imidazo[1,5-a]pyridine: Luminescence and Structural Dependence
Source: MDPI journal article supplement (doi:10.3390/molecules28093703), 2023-04-25
Supplement: s1 [file s1]

# **Mono-, bis- and tris-chelate Zn(II) complexes with imidazo[1,5-*a*]pyridine: luminescence and structural dependence**

Valerio Cerrato, Giorgio Volpi,\* Emanuele Priola, Alessia Giordana, Claudio Garino,\* Roberto Rabezzana, Eliano Diana.

Department of Chemistry, University of Turin, Via Pietro Giuria 7, 10125, Torino, Italy

Keywords: imidazo[1,5-*a*]pyridine, luminescence, fluorescence, zinc complex, quantum yield, Stokes shift.

### Synthesis of 3-phenyl-1-(pyridin-2-yl)imidazo[1,5-*a*]pyridine (L)

2,2'-dipyridyl ketone (800 mg, 4.37 mmol, 1 eq), benzaldehyde (6.55 mmol, 1.5 eq) and ammonium acetate (1704 mg, 21.85 mmol, 5 eq) are put in a 50 ml round-bottom flask (the large excess of aldehyde is needed to minimise the amount of unreacted ketone). Then 15 ml of glacial acetic acid is added as solvent. The reaction proceeds under reflux ( $T = 118\text{ }^{\circ}\text{C}$ ) for 12 hours. The reaction progress is monitored via thin-layer chromatography. Yield: 69%.

Mass (ESI +):  $m/z = 272.21$ , corresponding to the protonated molecule.

$^1\text{H}$  NMR spectroscopy (600 MHz, DMSO- $d_6$ ):  $\delta$  8.59 (1H, d,  $J = 9.0$  Hz), 8.48 (1H, d,  $J = 4.5$  Hz), 8.10 (1H, d,  $J = 7.5$  Hz), 7.85 (2H, d,  $J = 7.5$  Hz), 7.79 (1H, t,  $J = 7.5$  Hz), 7.56 (3H, t,  $J = 7.5$  Hz), 7.49 (1H, t,  $J = 7.5$  Hz), 7.16 (1H, dd,  $J = 6.5$  Hz), 7.03 (1H, dd,  $J = 9$  Hz), 6.82 (1H, t,  $J = 6.5$  Hz).

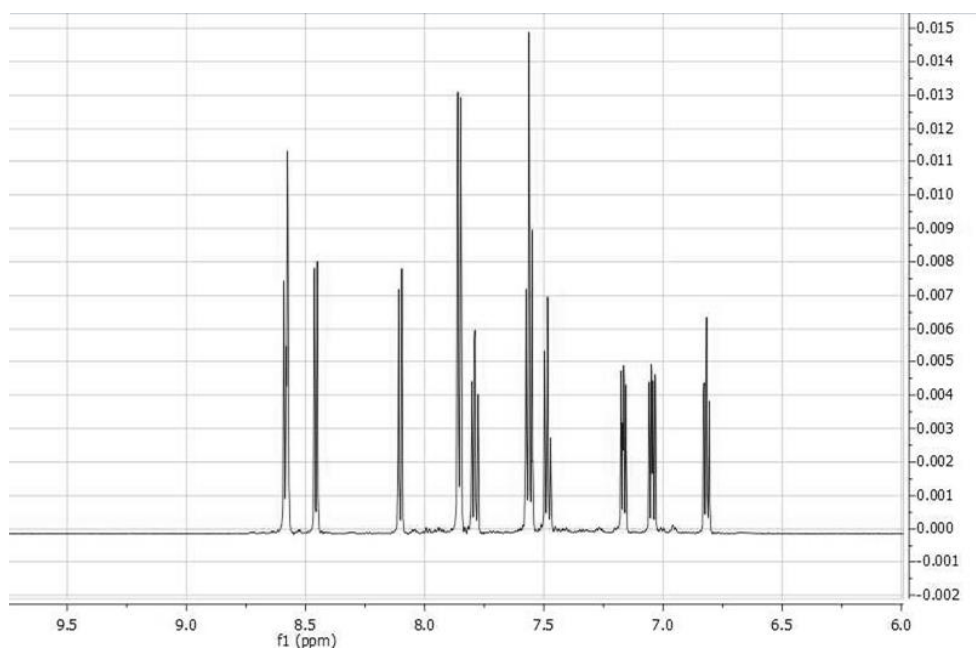

**Figure S1.**  $^1\text{H}$  NMR spectrum of 3-phenyl-1-(pyridin-2-yl)imidazo[1,5-*a*]pyridine (L) in DMSO- $d_6$ .

Mass Spectra from methanolic solutions:

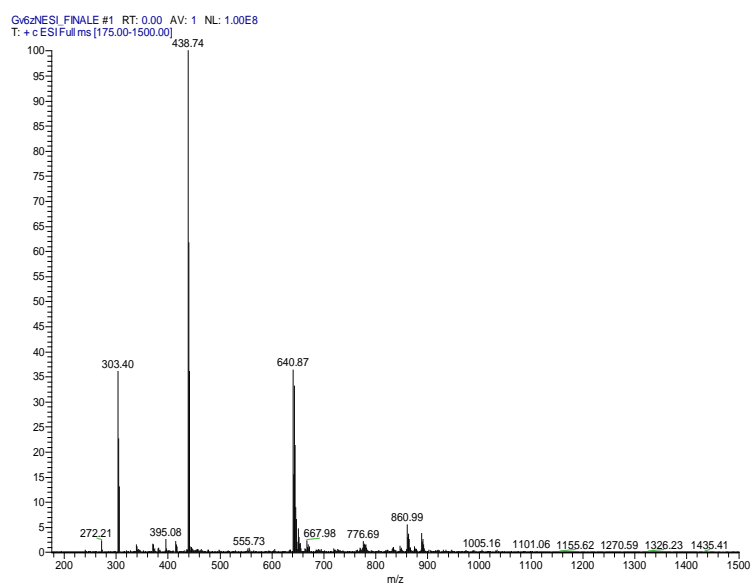

**Figure S2.** Positive ionisation ESI-MS full mass spectrum of complex  $[\text{Zn}(\text{L})\text{Cl}_2]$ .

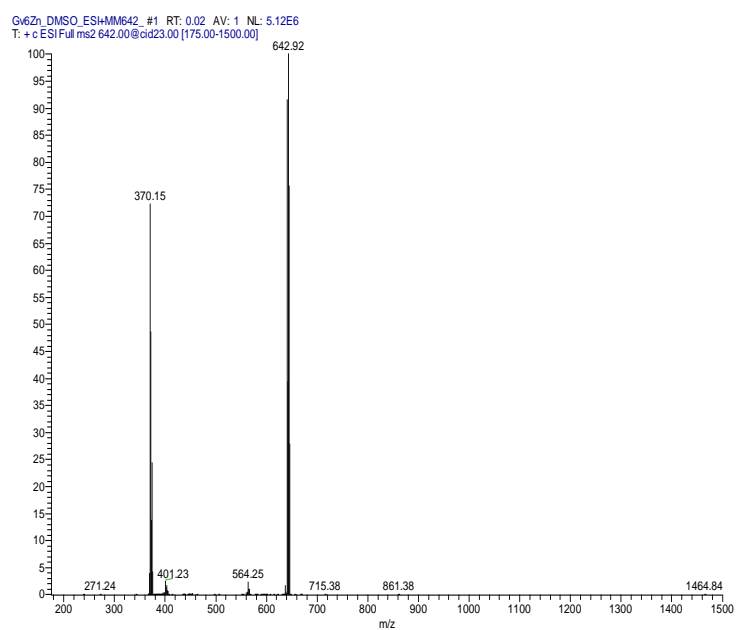

**Figure S3.** Positive ionisation ESI-MS/MS mass spectrum of the ion complex  $[\text{Zn}(\text{L})_2\text{Cl}]^+$  ( $m/z = 641$ ), formed by ionization of  $[\text{Zn}(\text{L})\text{Cl}_2]$ .

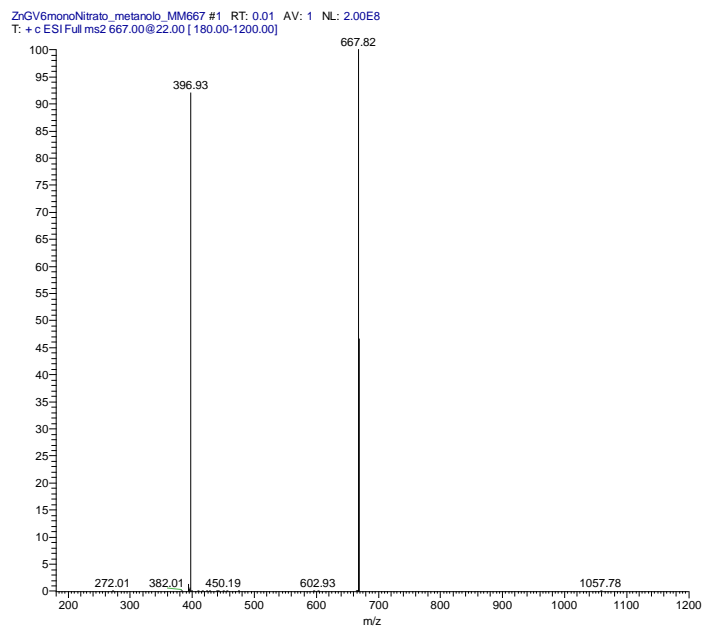

**Figure S4.** Positive ionisation ESI-MS/MS mass spectrum of complex  $[\text{Zn}(\text{L})_2(\text{NO}_3)]^+$  ( $m/z = 668$ ), formed by ionisation of  $[\text{Zn}(\text{L})(\text{NO}_3)_2]$ .

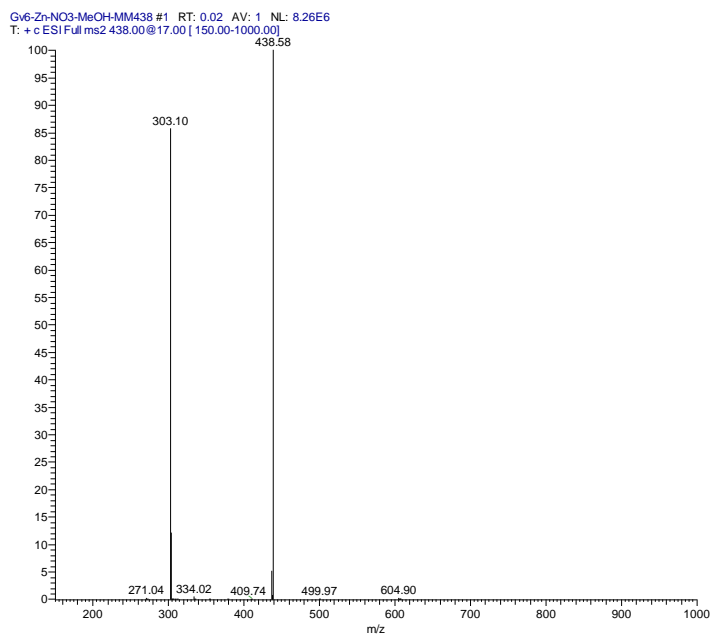

**Figure S5.** Positive ionisation ESI-MS/MS mass spectrum of complex  $[\text{Zn}(\text{L})_3]^{2+}$  ( $m/z = 439$ ), formed by ionisation of  $[\text{Zn}(\text{L})(\text{NO}_3)_2]$ .

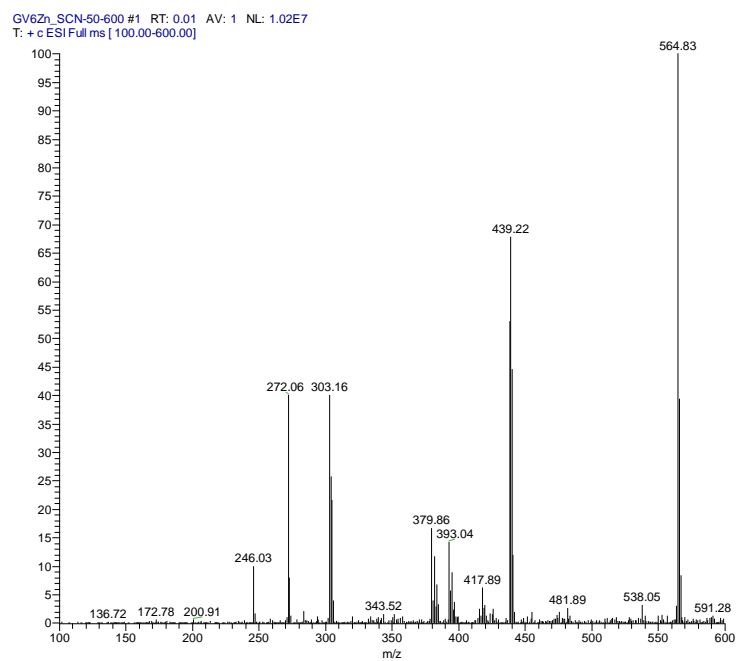

**Figure S6.** Positive ionisation ESI-MS mass spectrum of complex  $[\text{Zn}(\text{L})_3][\text{Zn}(\text{SCN})_4]$ .

**Table S1.** Raman and IR signals of **L** and Zn(II) mono- and tris-chelated complexes.

| <b>L</b>                 |                                   | <b>[Zn(L)(Cl)<sub>2</sub>]</b> |                                         | <b>[Zn(L)(NO<sub>3</sub>)<sub>2</sub>]</b> |                               | <b>[Zn(L)<sub>3</sub>][Zn(SCN)<sub>4</sub>]</b> |                                          |                                                |
|--------------------------|-----------------------------------|--------------------------------|-----------------------------------------|--------------------------------------------|-------------------------------|-------------------------------------------------|------------------------------------------|------------------------------------------------|
| Raman                    | IR                                | Raman                          | IR                                      | Raman                                      | IR                            | Raman                                           | IR                                       |                                                |
|                          |                                   |                                |                                         |                                            |                               | 2110 w<br>2077 w                                | 2109 w<br>2085 sh<br>2077 sh<br>2068 vvs | $\nu$ C $\equiv$ N                             |
| 1631 m                   | 1634 w                            | 1638 w                         | 1649 w                                  | 1643 w                                     | 1642 w                        | 1638 w                                          | 1638 w                                   | $\nu$ ring B                                   |
| 1603 s                   | 1602 w                            | 1604<br>vs                     | 1609 s                                  | 1607 s                                     | 1610 m                        |                                                 |                                          | $\nu$ ring D                                   |
| 1588 s                   | 1584 s                            |                                | 1602<br>sh                              |                                            | 1600 m                        | 1607 s                                          | 1607 s                                   | $\nu$ ring C                                   |
|                          |                                   | 1589<br>sh                     | 1589<br>sh                              |                                            |                               |                                                 | 1588 sh                                  | $\nu$ ring D <sup>a</sup>                      |
| 1563 w                   | 1562 m                            | 1562 w                         | 1563 w                                  | 1567 w                                     | 1566<br>vw                    | 1568 w                                          | 1565 w                                   | $\nu$ C=N + $\nu$ C=C                          |
| 1533 vs                  | 1532 m                            | 1547 s                         | 1549 m                                  | 1552<br>vs                                 | 1551 m                        | 1551 w                                          | 1548 m                                   | $\nu$ ring A+B                                 |
| 1523 s                   | 1524 m                            | 1533 s                         | 1535 m                                  | 1537<br>vs                                 | 1536 w                        | 1534 vs                                         | 1532 m                                   | $\nu$ C1–C ring D                              |
| 1507 s                   | 1508 s                            | 1513<br>vs                     | 1515 s                                  | 1518 s                                     | 1518<br>sh<br>1510 s          | 1515 m                                          | 1512 s                                   | $\nu$ ring A+B + $\nu$ C2–C<br>ring C          |
|                          |                                   |                                |                                         |                                            | 1495 s                        |                                                 |                                          | $\nu$ N=O                                      |
| 1460 m                   | 1465 sh                           | 1478 w                         | 1479 s                                  | 1479 w                                     | 1476<br>vs                    | 1482 w                                          | 1479 s                                   | $\nu$ C=C + $\delta$ CCH                       |
| 1443 m<br>1428 m         | 1443 m<br>1427 m                  | 1447 m<br>1436 m               | 1448 m<br>1438 s                        | 1449 m<br>1436 m                           | 1448 s<br>1435 s              | 1442 m                                          | 1446 m<br>1436 m                         | $\delta$ CCH + $\delta$ CCC                    |
| 1404 w                   | 1403 m                            | 1408 m                         |                                         | 1411 m                                     |                               | 1410 w                                          | 1409 vw                                  | $\delta$ C=N                                   |
| 1354 s                   | 1354 m                            | 1369 m                         | 1370 m                                  | 1369 m                                     | 1367 m                        | 1363 m                                          | 1358 w                                   | $\nu$ ring A + $\delta$ CCH                    |
| 1333 w                   | 1334 w                            | 1342 w                         | 1342 m                                  | 1342<br>sh                                 | 1342 m                        | 1335 m                                          |                                          | $\delta$ CCH                                   |
| 1317 w                   | 1317 m                            | 1329 m<br>1317 w               | 1330<br>sh<br>1317 w                    | 1332 s<br>1316 w                           | 1316 w                        |                                                 | 1331 m                                   | Kekulé mode<br>ring D, B, A                    |
| 1277 vw                  | 1277 m                            | 1285 w                         | 1287 w                                  | 1287 w                                     | 1294 m                        | 1281 w                                          | 1281 w                                   | Kekulé mode<br>ring C                          |
|                          |                                   |                                |                                         |                                            | 1218 s<br>1265 s              |                                                 |                                          | $\nu_a$ (NO <sub>2</sub> )                     |
| 1245 m                   | 1247 m                            | 1256 m                         | 1255 w                                  | 1255 w                                     | 1250<br>sh                    | 1251 w                                          | 1251 w                                   | $\nu$ ring A + $\delta$ CCH                    |
| 1008 w<br>998 m<br>980 s | 1008 m<br>997 w<br>980 w<br>950 m | 1023 m<br>1012 m<br>994 s      | 1032 w<br>1025<br>vw<br>1014 m<br>997 w | 1027 s*<br>1015 m<br>997 s                 | 1035<br>vw<br>1012 m<br>995 w | 1021 w<br>997 m                                 | 1031 w<br>1008 m<br>993 m                | Breathing mode<br>* $\nu_s$ (NO <sub>2</sub> ) |
| 790 vvw                  | 786 m                             |                                | 795 m<br>783 s<br>770 m                 |                                            | 794 w<br>780 m<br>769 w       |                                                 | 791 sh<br>781 s<br>763 m                 | Breathing mode                                 |

| L                                                                                                                                                  |                                  | [Zn(L)(Cl) <sub>2</sub> ] |                          | [Zn(L)(NO <sub>3</sub> ) <sub>2</sub> ] |                | [Zn(L) <sub>3</sub> ][Zn(SCN) <sub>4</sub> ] |                |                          |
|----------------------------------------------------------------------------------------------------------------------------------------------------|----------------------------------|---------------------------|--------------------------|-----------------------------------------|----------------|----------------------------------------------|----------------|--------------------------|
| Raman                                                                                                                                              | IR                               | Raman                     | IR                       | Raman                                   | IR             | Raman                                        | IR             |                          |
| 747 w<br>729 vvw<br>702 vvw                                                                                                                        | 746 m<br>737 m<br>729 m<br>700 m |                           | 752 sh<br>747 s<br>732 w |                                         | 752 w<br>737 m |                                              | 748 m<br>736 m | γ CCH                    |
| 685 vw                                                                                                                                             | 691 s                            |                           | 697 vs                   |                                         | 696 s          |                                              | 698 s          | Breathing mode A+B rings |
|                                                                                                                                                    |                                  | 340 m                     |                          | 350 w                                   |                | 340 w                                        |                | Ligand mode              |
|                                                                                                                                                    |                                  |                           | 331 s<br>308 s           |                                         |                |                                              |                | Zn-Cl                    |
|                                                                                                                                                    |                                  |                           |                          |                                         | 282 m<br>265 m |                                              |                | Zn-O                     |
|                                                                                                                                                    |                                  |                           |                          |                                         |                | 270 w                                        | 270 m, br      | Zn-N (SCN)               |
|                                                                                                                                                    |                                  | 170 w                     | 170 w                    | 175 w                                   | 175w           |                                              | 172 m          | Zn-N (L)?                |
| s=strong, m=medium, w=weak, v=very, sh=shoulder, br=broad, v=stretching, δ=bending, γ=out-of-plane deformation, numbering as indicate in Figure S7 |                                  |                           |                          |                                         |                |                                              |                |                          |

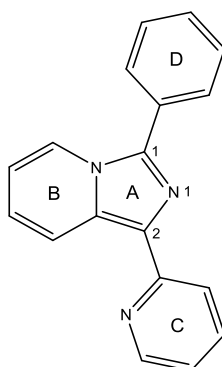

**Figure S7.** Molecular structure and numbering of L for vibrational assignment.

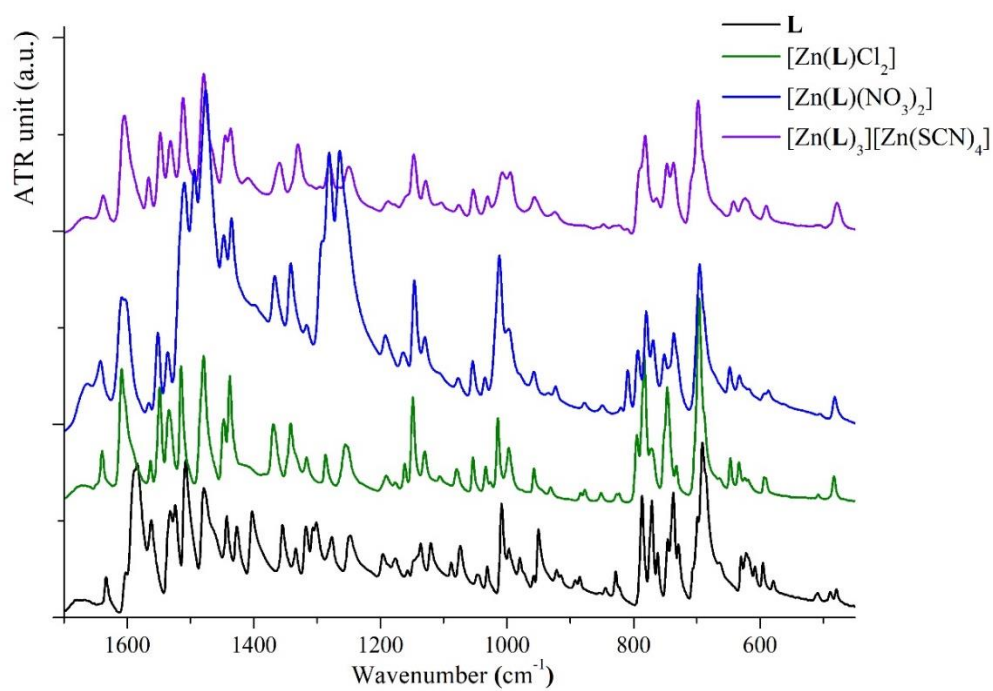

**Figure S8.** FTIR-ATR spectra of ligand **L** and corresponding mono-chelated and tri-chelated complexes.



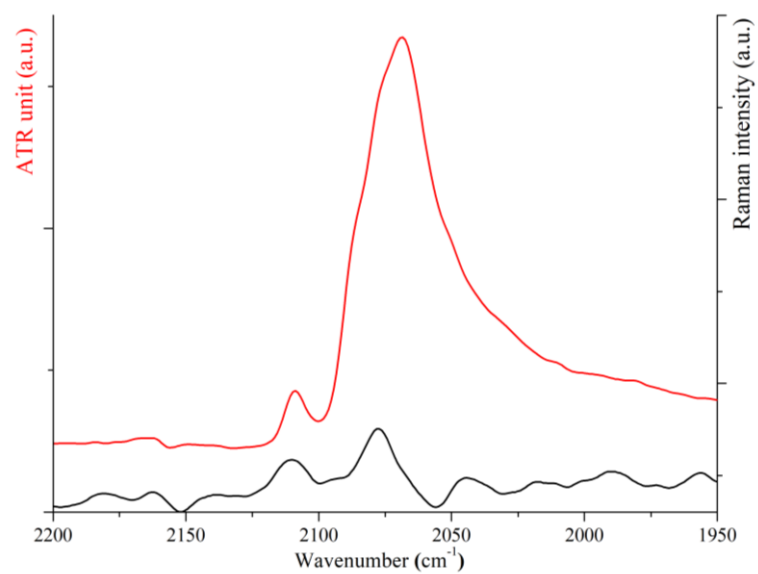

**Figure S9.** FTIR-ATR (red) and Raman (black) spectra of  $[\text{Zn}(\text{L})_3][\text{Zn}(\text{SCN})_4]$ .

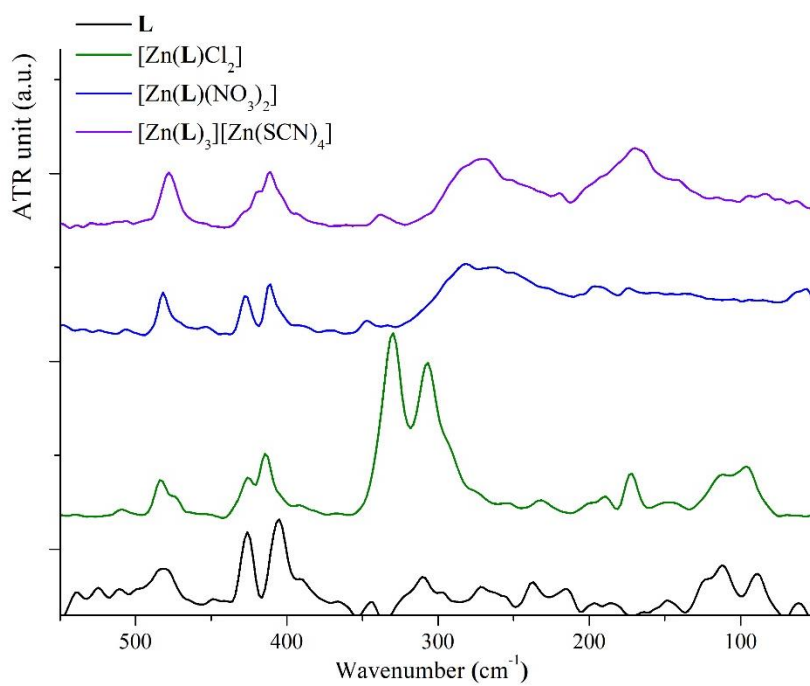

**Figure S10.** FTIR-ATR spectra in the Far-IR region of ligand **L** and corresponding mono-chelated and tri-chelated complexes.

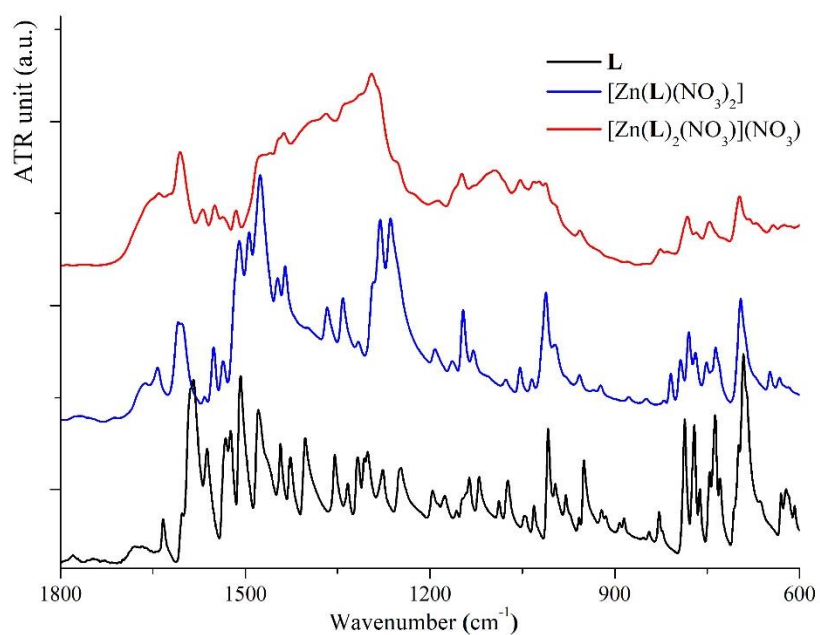

**Figure S11.** FTIR-ATR spectra of ligand **L** and corresponding mono-chelated and bis-chelated complexes obtained using nitrate as ancillary ligand.

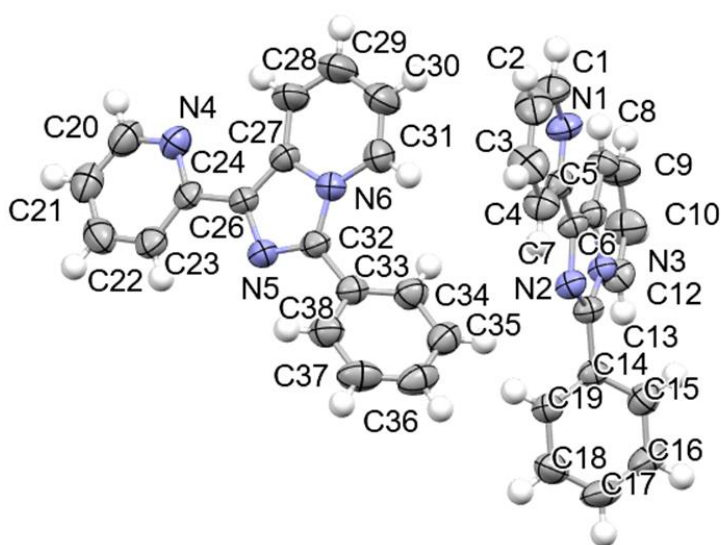

**Figure S12.** Asymmetric unit of **L**.

**Table S2.** Crystal data and structure refinement for **L**.

|                                                |                                                                |
|------------------------------------------------|----------------------------------------------------------------|
| Empirical formula                              | C <sub>18</sub> H <sub>13</sub> N <sub>3</sub>                 |
| Formula weight                                 | 271.31                                                         |
| Temperature/K                                  | 293.00                                                         |
| Crystal system                                 | triclinic                                                      |
| Space group                                    | P-1                                                            |
| a/Å                                            | 9.0118(16)                                                     |
| b/Å                                            | 10.5527(15)                                                    |
| c/Å                                            | 15.107(2)                                                      |
| $\alpha/^\circ$                                | 95.821(12)                                                     |
| $\beta/^\circ$                                 | 98.725(14)                                                     |
| $\gamma/^\circ$                                | 96.787(14)                                                     |
| Volume/Å <sup>3</sup>                          | 1399.6(4)                                                      |
| Z                                              | 4                                                              |
| $\rho_{\text{calc}}/\text{g/cm}^3$             | 1.288                                                          |
| $\mu/\text{mm}^{-1}$                           | 0.078                                                          |
| F(000)                                         | 568.0                                                          |
| Crystal size/mm <sup>3</sup>                   | 0.11 × 0.1 × 0.08                                              |
| Radiation                                      | MoK $\alpha$ ( $\lambda$ = 0.71073)                            |
| 2 $\Theta$ range for data collection/ $^\circ$ | 6.35 to 59.078                                                 |
| Index ranges                                   | -11 ≤ h ≤ 11, -10 ≤ k ≤ 14, -18 ≤ l ≤ 20                       |
| Reflections collected                          | 12738                                                          |
| Independent reflections                        | 6435 [ $R_{\text{int}}$ = 0.0904, $R_{\text{sigma}}$ = 0.2429] |
| Data/restraints/parameters                     | 6435/0/379                                                     |
| Goodness-of-fit on F <sup>2</sup>              | 0.945                                                          |
| Final R indexes [ $I \geq 2\sigma(I)$ ]        | $R_1$ = 0.0936, $wR_2$ = 0.1508                                |
| Final R indexes [all data]                     | $R_1$ = 0.3034, $wR_2$ = 0.3884                                |
| Largest diff. peak/hole / e Å <sup>-3</sup>    | 0.15/-0.16                                                     |

**Table S3.** Bond lengths for **L**.

| Atom | Atom | Length/Å | Atom | Atom | Length/Å |
|------|------|----------|------|------|----------|
| N3   | C13  | 1.380(4) | N6   | C32  | 1.376(4) |
| N3   | C7   | 1.404(4) | N6   | C31  | 1.396(4) |
| N3   | C12  | 1.371(4) | C19  | C18  | 1.386(5) |
| N2   | C6   | 1.375(4) | C33  | C34  | 1.385(5) |
| N2   | C13  | 1.318(5) | C33  | C32  | 1.472(5) |
| N5   | C26  | 1.380(4) | C33  | C38  | 1.375(5) |
| N5   | C32  | 1.323(4) | C12  | C10  | 1.346(5) |
| C6   | C7   | 1.379(5) | C23  | C22  | 1.386(5) |
| C6   | C5   | 1.451(5) | C34  | C35  | 1.387(5) |
| C27  | C26  | 1.375(5) | C35  | C36  | 1.377(6) |
| C27  | N6   | 1.403(4) | C31  | C30  | 1.329(5) |

|     |     |          |  |     |     |          |
|-----|-----|----------|--|-----|-----|----------|
| C27 | C28 | 1.405(5) |  | C8  | C9  | 1.344(5) |
| C13 | C14 | 1.475(5) |  | C18 | C17 | 1.363(6) |
| C7  | C8  | 1.413(5) |  | C17 | C16 | 1.366(6) |
| C26 | C24 | 1.461(5) |  | C10 | C9  | 1.413(5) |
| C5  | N1  | 1.345(4) |  | C3  | C4  | 1.375(5) |
| C5  | C4  | 1.389(5) |  | C3  | C2  | 1.370(5) |
| N1  | C1  | 1.341(5) |  | C1  | C2  | 1.375(6) |
| C14 | C15 | 1.389(5) |  | C20 | C21 | 1.358(5) |
| C14 | C19 | 1.368(5) |  | C21 | C22 | 1.372(5) |
| C15 | C16 | 1.390(5) |  | C36 | C37 | 1.367(6) |
| C24 | N4  | 1.349(4) |  | C28 | C29 | 1.345(5) |
| C24 | C23 | 1.378(5) |  | C30 | C29 | 1.415(5) |
| N4  | C20 | 1.331(4) |  | C37 | C38 | 1.389(5) |

**Table S4.** Bond angles for **L**.

| Atom | Atom | Atom | Angle/°  |  | Atom | Atom | Atom | Angle/°  |
|------|------|------|----------|--|------|------|------|----------|
| C13  | N3   | C7   | 106.4(3) |  | C32  | N6   | C31  | 130.9(4) |
| C12  | N3   | C13  | 130.9(4) |  | C31  | N6   | C27  | 121.6(3) |
| C12  | N3   | C7   | 122.5(3) |  | C14  | C19  | C18  | 120.4(5) |
| C13  | N2   | C6   | 106.7(3) |  | C34  | C33  | C32  | 122.0(4) |
| C32  | N5   | C26  | 106.3(3) |  | C38  | C33  | C34  | 119.5(4) |
| N2   | C6   | C7   | 110.2(4) |  | C38  | C33  | C32  | 118.5(4) |
| N2   | C6   | C5   | 121.2(4) |  | C10  | C12  | N3   | 118.4(4) |
| C7   | C6   | C5   | 128.5(4) |  | C24  | C23  | C22  | 118.7(4) |
| C26  | C27  | N6   | 104.9(3) |  | C33  | C34  | C35  | 120.2(4) |
| C26  | C27  | C28  | 137.8(4) |  | N5   | C32  | N6   | 110.9(3) |
| N6   | C27  | C28  | 117.3(4) |  | N5   | C32  | C33  | 124.2(4) |
| N3   | C13  | C14  | 124.3(4) |  | N6   | C32  | C33  | 125.0(4) |
| N2   | C13  | N3   | 111.3(3) |  | C36  | C35  | C34  | 120.1(5) |
| N2   | C13  | C14  | 124.3(4) |  | C30  | C31  | N6   | 118.6(4) |
| N3   | C7   | C8   | 117.8(4) |  | C9   | C8   | C7   | 119.1(4) |
| C6   | C7   | N3   | 105.5(3) |  | C17  | C18  | C19  | 120.3(5) |
| C6   | C7   | C8   | 136.8(4) |  | C18  | C17  | C16  | 120.1(5) |
| N5   | C26  | C24  | 121.2(4) |  | C12  | C10  | C9   | 120.8(4) |
| C27  | C26  | N5   | 110.6(3) |  | C2   | C3   | C4   | 119.3(5) |
| C27  | C26  | C24  | 128.1(4) |  | N1   | C1   | C2   | 124.1(4) |
| N1   | C5   | C6   | 117.7(4) |  | N4   | C20  | C21  | 125.4(4) |
| N1   | C5   | C4   | 122.1(4) |  | C20  | C21  | C22  | 117.8(4) |
| C4   | C5   | C6   | 120.2(4) |  | C37  | C36  | C35  | 119.6(4) |
| C1   | N1   | C5   | 117.0(4) |  | C3   | C4   | C5   | 119.2(4) |
| C15  | C14  | C13  | 121.6(4) |  | C8   | C9   | C10  | 121.3(4) |

|     |     |     |          |     |     |     |          |
|-----|-----|-----|----------|-----|-----|-----|----------|
| C19 | C14 | C13 | 119.1(4) | C29 | C28 | C27 | 120.9(4) |
| C19 | C14 | C15 | 119.3(4) | C3  | C2  | C1  | 118.2(5) |
| C14 | C15 | C16 | 119.7(4) | C31 | C30 | C29 | 121.8(4) |
| N4  | C24 | C26 | 116.5(4) | C21 | C22 | C23 | 119.2(4) |
| N4  | C24 | C23 | 122.5(4) | C17 | C16 | C15 | 120.2(5) |
| C23 | C24 | C26 | 120.9(4) | C36 | C37 | C38 | 120.8(5) |
| C20 | N4  | C24 | 116.4(4) | C28 | C29 | C30 | 119.7(4) |
| C32 | N6  | C27 | 107.2(3) | C33 | C38 | C37 | 119.9(5) |

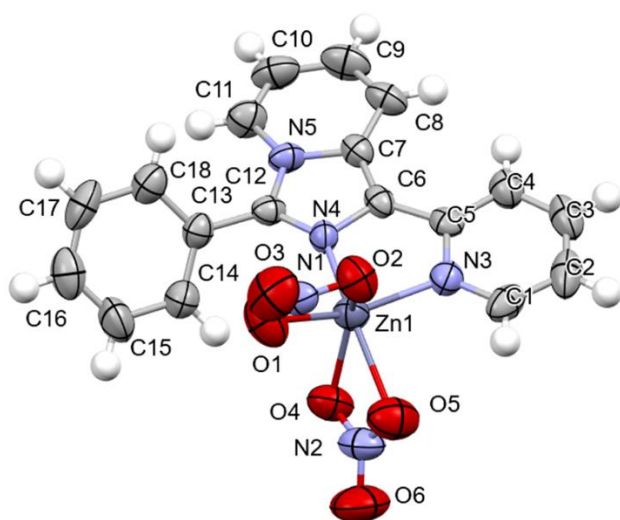

**Figure S13.** Asymmetric unit of  $[\text{Zn}(\text{L})(\text{NO}_3)_2]$ .

**Table S5.** Crystal data and structure refinement for  $[\text{Zn}(\text{L})(\text{NO}_3)_2]$ .

|                                       |                                                           |
|---------------------------------------|-----------------------------------------------------------|
| Empirical formula                     | $\text{C}_{18}\text{H}_{13}\text{N}_5\text{O}_6\text{Zn}$ |
| Formula weight                        | 460.73                                                    |
| Temperature/K                         | 298.00                                                    |
| Crystal system                        | monoclinic                                                |
| Space group                           | $\text{P2}_1/\text{n}$                                    |
| $a/\text{\AA}$                        | 14.791(3)                                                 |
| $b/\text{\AA}$                        | 8.2582(16)                                                |
| $c/\text{\AA}$                        | 15.828(4)                                                 |
| $\alpha/^\circ$                       | 90                                                        |
| $\beta/^\circ$                        | 107.40(2)                                                 |
| $\gamma/^\circ$                       | 90                                                        |
| Volume/ $\text{\AA}^3$                | 1844.8(7)                                                 |
| Z                                     | 4                                                         |
| $\rho_{\text{calc}}/\text{g cm}^{-3}$ | 1.6587                                                    |
| $\mu/\text{mm}^{-1}$                  | 1.381                                                     |

|                                             |                                                               |
|---------------------------------------------|---------------------------------------------------------------|
| F(000)                                      | 937.7                                                         |
| Crystal size/mm <sup>3</sup>                | 0.1 × 0.09 × 0.04                                             |
| Radiation                                   | Mo K $\alpha$ ( $\lambda$ = 0.71073)                          |
| 2 $\Theta$ range for data collection/°      | 6.62 to 52.74                                                 |
| Index ranges                                | -17 ≤ h ≤ 18, -8 ≤ k ≤ 10, -19 ≤ l ≤ 13                       |
| Reflections collected                       | 7294                                                          |
| Independent reflections                     | 3615 [R <sub>int</sub> = 0.1106, R <sub>sigma</sub> = 0.2230] |
| Data/restraints/parameters                  | 3615/0/272                                                    |
| Goodness-of-fit on F <sup>2</sup>           | 0.926                                                         |
| Final R indexes [I ≥ 2 $\sigma$ (I)]        | R <sub>1</sub> = 0.0729, wR <sub>2</sub> = 0.2289             |
| Final R indexes [all data]                  | R <sub>1</sub> = 0.2168, wR <sub>2</sub> = 0.2304             |
| Largest diff. peak/hole / e Å <sup>-3</sup> | 1.75/-1.31                                                    |

**Table S6.** Bond lengths for [Zn(L)(NO<sub>3</sub>)<sub>2</sub>].

| Atom | Atom | Length/Å  | Atom | Atom | Length/Å  |
|------|------|-----------|------|------|-----------|
| Zn1  | N3   | 2.069(5)  | C13  | C12  | 1.476(8)  |
| Zn1  | O4   | 2.074(5)  | C13  | C18  | 1.375(9)  |
| Zn1  | N4   | 2.041(6)  | C13  | C14  | 1.382(9)  |
| Zn1  | O2   | 2.153(5)  | C7   | C6   | 1.386(9)  |
| Zn1  | O1   | 2.130(5)  | C11  | C10  | 1.331(9)  |
| Zn1  | O5   | 2.323(6)  | C1   | C2   | 1.369(9)  |
| N5   | C7   | 1.402(7)  | N2   | O6   | 1.200(8)  |
| N5   | C12  | 1.375(8)  | N2   | O5   | 1.222(8)  |
| N5   | C11  | 1.383(8)  | N1   | O2   | 1.232(7)  |
| N3   | C5   | 1.340(8)  | N1   | O1   | 1.250(7)  |
| N3   | C1   | 1.340(8)  | N1   | O3   | 1.218(7)  |
| O4   | N2   | 1.271(8)  | C4   | C3   | 1.372(10) |
| C8   | C7   | 1.425(9)  | C3   | C2   | 1.365(10) |
| C8   | C9   | 1.338(10) | C17  | C16  | 1.379(10) |
| N4   | C12  | 1.309(8)  | C17  | C18  | 1.396(9)  |
| N4   | C6   | 1.379(7)  | C16  | C15  | 1.349(10) |
| C5   | C6   | 1.457(9)  | C10  | C9   | 1.399(10) |
| C5   | C4   | 1.389(8)  | C15  | C14  | 1.382(9)  |

**Table S7.** Bond angles for [Zn(L)(NO<sub>3</sub>)<sub>2</sub>].

| Atom | Atom | Atom | Angle/°  | Atom | Atom | Atom | Angle/°   |
|------|------|------|----------|------|------|------|-----------|
| O4   | Zn1  | N3   | 110.1(2) | C14  | C13  | C18  | 119.8(7)  |
| N4   | Zn1  | N3   | 80.8(2)  | C8   | C7   | N5   | 117.2(7)  |
| N4   | Zn1  | O4   | 105.7(2) | C6   | C7   | N5   | 105.0(6)  |
| O2   | Zn1  | N3   | 94.5(2)  | C6   | C7   | C8   | 137.7(7)  |
| O2   | Zn1  | O4   | 138.0(2) | N4   | C12  | N5   | 108.9(6)  |
| O2   | Zn1  | N4   | 111.5(2) | C13  | C12  | N5   | 123.8(7)  |
| O1   | Zn1  | N3   | 152.9(2) | C13  | C12  | N4   | 127.3(7)  |
| O1   | Zn1  | O4   | 95.0(2)  | C5   | C6   | N4   | 118.9(6)  |
| O1   | Zn1  | N4   | 102.7(2) | C7   | C6   | N4   | 108.3(6)  |
| O1   | Zn1  | O2   | 58.9(2)  | C7   | C6   | C5   | 132.7(6)  |
| O5   | Zn1  | N3   | 92.8(2)  | C10  | C11  | N5   | 119.7(7)  |
| O5   | Zn1  | O4   | 57.3(2)  | C2   | C1   | N3   | 122.0(8)  |
| O5   | Zn1  | N4   | 158.6(2) | O6   | N2   | O4   | 120.3(9)  |
| O5   | Zn1  | O2   | 89.2(2)  | O5   | N2   | O4   | 116.3(8)  |
| O5   | Zn1  | O1   | 92.4(2)  | O5   | N2   | O6   | 123.4(10) |
| C12  | N5   | C7   | 108.3(6) | O1   | N1   | O2   | 116.1(7)  |
| C11  | N5   | C7   | 121.7(6) | O3   | N1   | O2   | 122.2(8)  |
| C11  | N5   | C12  | 129.8(6) | O3   | N1   | O1   | 121.6(7)  |

|     |     |     |          |     |     |     |          |
|-----|-----|-----|----------|-----|-----|-----|----------|
| C5  | N3  | Zn1 | 114.8(5) | N1  | O2  | Zn1 | 92.1(5)  |
| C1  | N3  | Zn1 | 125.8(5) | C3  | C4  | C5  | 117.5(8) |
| C1  | N3  | C5  | 119.3(6) | N1  | O1  | Zn1 | 92.6(4)  |
| N2  | O4  | Zn1 | 98.4(5)  | C2  | C3  | C4  | 121.1(7) |
| C9  | C8  | C7  | 118.8(7) | C18 | C17 | C16 | 119.7(8) |
| C12 | N4  | Zn1 | 139.1(5) | C15 | C16 | C17 | 120.3(8) |
| C6  | N4  | Zn1 | 111.5(5) | N2  | O5  | Zn1 | 87.9(5)  |
| C6  | N4  | C12 | 109.4(6) | C17 | C18 | C13 | 119.5(8) |
| C6  | C5  | N3  | 113.7(6) | C9  | C10 | C11 | 119.9(8) |
| C4  | C5  | N3  | 121.7(7) | C3  | C2  | C1  | 118.4(8) |
| C4  | C5  | C6  | 124.6(7) | C14 | C15 | C16 | 120.7(8) |
| C18 | C13 | C12 | 121.1(7) | C15 | C14 | C13 | 119.8(8) |
| C14 | C13 | C12 | 118.9(7) | C10 | C9  | C8  | 122.6(8) |

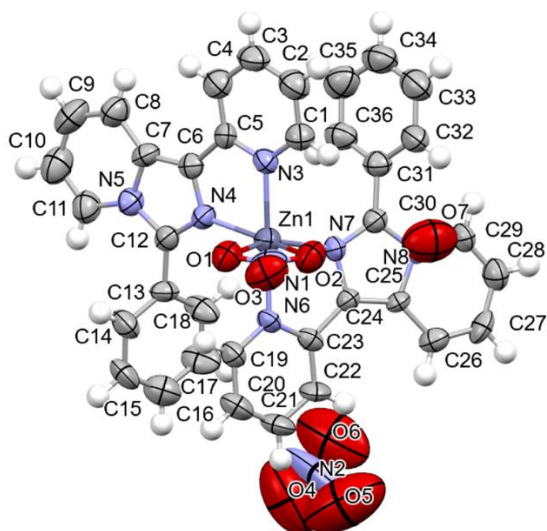

**Figure S14.** Asymmetric unit of  $[\text{Zn}(\text{L})_2(\text{NO}_3)](\text{NO}_3) \cdot \text{H}_2\text{O}$ .

**Table S8.** Crystal data and structure refinement for  $[\text{Zn}(\text{L})_2(\text{NO}_3)](\text{NO}_3) \cdot \text{H}_2\text{O}$ .

|                   |                                                           |
|-------------------|-----------------------------------------------------------|
| Empirical formula | $\text{C}_{36}\text{H}_{26}\text{N}_8\text{O}_7\text{Zn}$ |
| Formula weight    | 748.02                                                    |
| Temperature/K     | 298                                                       |
| Crystal system    | triclinic                                                 |
| Space group       | P-1                                                       |
| $a/\text{\AA}$    | 10.9841(14)                                               |
| $b/\text{\AA}$    | 11.998(2)                                                 |
| $c/\text{\AA}$    | 14.8171(15)                                               |
| $\alpha/^\circ$   | 85.369(11)                                                |
| $\beta/^\circ$    | 89.737(9)                                                 |
| $\gamma/^\circ$   | 68.886(13)                                                |



|                                             |                                                               |
|---------------------------------------------|---------------------------------------------------------------|
| Volume/Å <sup>3</sup>                       | 1815.0(4)                                                     |
| Z                                           | 2                                                             |
| ρ <sub>calc</sub> /g/cm <sup>3</sup>        | 1.369                                                         |
| μ/mm <sup>-1</sup>                          | 1.439                                                         |
| F(000)                                      | 768.0                                                         |
| Crystal size/mm <sup>3</sup>                | 0.15 × 0.12 × 0.11                                            |
| Radiation                                   | CuKα (λ = 1.54184)                                            |
| 2Θ range for data collection/°              | 7.928 to 135.944                                              |
| Index ranges                                | -13 ≤ h ≤ 13, -14 ≤ k ≤ 14, -17 ≤ l ≤ 17                      |
| Reflections collected                       | 6684                                                          |
| Independent reflections                     | 6607 [R <sub>int</sub> = 0.0858, R <sub>sigma</sub> = 0.0932] |
| Data/restraints/parameters                  | 6607/126/469                                                  |
| Goodness-of-fit on F <sup>2</sup>           | 0.970                                                         |
| Final R indexes [I ≥ 2σ (I)]                | R <sub>1</sub> = 0.0446, wR <sub>2</sub> = 0.0816             |
| Final R indexes [all data]                  | R <sub>1</sub> = 0.0673, wR <sub>2</sub> = 0.0929             |
| Largest diff. peak/hole / e Å <sup>-3</sup> | 0.21/-0.29                                                    |

**Table S9.** Bond lengths for [Zn(L)<sub>2</sub>(NO<sub>3</sub>)](NO<sub>3</sub>)·H<sub>2</sub>O.

| Atom | Atom | Length/Å  |  | Atom | Atom | Length/Å  |
|------|------|-----------|--|------|------|-----------|
| Zn1  | N6   | 2.111(6)  |  | C35  | C34  | 1.359(10) |
| Zn1  | N3   | 2.118(6)  |  | C31  | C32  | 1.374(9)  |
| Zn1  | O1   | 2.253(6)  |  | C18  | C17  | 1.379(10) |
| Zn1  | O2   | 2.293(6)  |  | C18  | C13  | 1.378(9)  |
| Zn1  | N4   | 2.049(6)  |  | C34  | C33  | 1.360(10) |
| Zn1  | N7   | 2.061(6)  |  | N5   | C12  | 1.365(9)  |
| C20  | C21  | 1.371(10) |  | N5   | C11  | 1.384(9)  |
| C20  | C19  | 1.374(9)  |  | N5   | C7   | 1.394(8)  |
| N6   | C19  | 1.331(9)  |  | C12  | C13  | 1.466(11) |
| N6   | C23  | 1.361(9)  |  | C11  | C10  | 1.341(10) |
| N3   | C5   | 1.327(8)  |  | C8   | C9   | 1.344(10) |
| N3   | C1   | 1.336(8)  |  | C8   | C7   | 1.396(10) |
| O1   | N1   | 1.273(9)  |  | C9   | C10  | 1.419(10) |
| C6   | C5   | 1.450(10) |  | C16  | C17  | 1.348(10) |
| C6   | N4   | 1.378(8)  |  | C16  | C15  | 1.362(10) |
| C6   | C7   | 1.373(10) |  | C13  | C14  | 1.375(9)  |
| N1   | O3   | 1.232(8)  |  | C14  | C15  | 1.389(10) |
| N1   | O2   | 1.265(8)  |  | C28  | C29  | 1.321(9)  |
| C5   | C4   | 1.395(9)  |  | C28  | C27  | 1.413(10) |
| N8   | C30  | 1.354(8)  |  | C21  | C22  | 1.353(9)  |
| N8   | C29  | 1.362(9)  |  | C24  | C23  | 1.467(10) |
| N8   | C25  | 1.401(8)  |  | C24  | C25  | 1.376(10) |
| C3   | C4   | 1.397(9)  |  | C24  | N7   | 1.391(8)  |

|     |     |           |  |     |     |           |
|-----|-----|-----------|--|-----|-----|-----------|
| C3  | C2  | 1.356(9)  |  | C22 | C23 | 1.383(9)  |
| C30 | C31 | 1.475(10) |  | C26 | C27 | 1.352(9)  |
| C30 | N7  | 1.325(8)  |  | C26 | C25 | 1.409(9)  |
| C36 | C35 | 1.396(10) |  | C32 | C33 | 1.402(9)  |
| C36 | C31 | 1.368(10) |  | O5  | N2  | 1.23(5)   |
| N4  | C12 | 1.325(9)  |  | O4  | N2  | 1.07(2)   |
| C1  | C2  | 1.390(9)  |  | O6  | N2  | 1.048(18) |

**Table S10.** Bond angles for [Zn(L)<sub>2</sub>(NO<sub>3</sub>)](NO<sub>3</sub>)·H<sub>2</sub>O.

| Atom | Atom | Atom | Angle/°   | Atom | Atom | Atom | Angle/°   |
|------|------|------|-----------|------|------|------|-----------|
| N6   | Zn1  | N3   | 173.7(3)  | C32  | C31  | C30  | 121.3(9)  |
| N6   | Zn1  | O1   | 86.1(3)   | C13  | C18  | C17  | 121.9(9)  |
| N6   | Zn1  | O2   | 84.8(2)   | C35  | C34  | C33  | 123.9(10) |
| N3   | Zn1  | O1   | 88.2(2)   | C12  | N5   | C11  | 128.1(10) |
| N3   | Zn1  | O2   | 89.8(3)   | C12  | N5   | C7   | 109.2(10) |
| O1   | Zn1  | O2   | 56.8(2)   | C11  | N5   | C7   | 122.7(9)  |
| N4   | Zn1  | N6   | 104.3(3)  | N4   | C12  | N5   | 108.6(9)  |
| N4   | Zn1  | N3   | 79.0(3)   | N4   | C12  | C13  | 128.0(10) |
| N4   | Zn1  | O1   | 96.5(2)   | N5   | C12  | C13  | 123.4(10) |
| N4   | Zn1  | O2   | 151.6(2)  | C10  | C11  | N5   | 117.3(9)  |
| N4   | Zn1  | N7   | 116.8(2)  | C9   | C8   | C7   | 119.3(9)  |
| N7   | Zn1  | N6   | 79.4(4)   | C8   | C9   | C10  | 120.7(10) |
| N7   | Zn1  | N3   | 104.1(3)  | C6   | C7   | N5   | 104.5(10) |
| N7   | Zn1  | O1   | 146.0(2)  | C6   | C7   | C8   | 137.0(11) |
| N7   | Zn1  | O2   | 91.2(2)   | N5   | C7   | C8   | 118.4(9)  |
| C21  | C20  | C19  | 119.2(9)  | C17  | C16  | C15  | 121.7(11) |
| C19  | N6   | Zn1  | 127.0(10) | C16  | C17  | C18  | 118.4(10) |
| C19  | N6   | C23  | 117.6(7)  | C18  | C13  | C12  | 120.1(13) |
| C23  | N6   | Zn1  | 115.3(9)  | C14  | C13  | C18  | 118.4(9)  |
| C5   | N3   | Zn1  | 114.2(6)  | C14  | C13  | C12  | 121.5(14) |
| C5   | N3   | C1   | 120.4(7)  | C13  | C14  | C15  | 119.7(9)  |
| C1   | N3   | Zn1  | 125.4(7)  | C29  | C28  | C27  | 121.5(9)  |
| N1   | O1   | Zn1  | 93.9(6)   | C28  | C29  | N8   | 119.4(9)  |
| N4   | C6   | C5   | 116.9(9)  | C22  | C21  | C20  | 119.1(9)  |
| C7   | C6   | C5   | 133.6(10) | C25  | C24  | C23  | 133.4(10) |
| C7   | C6   | N4   | 109.6(8)  | C25  | C24  | N7   | 108.9(8)  |
| O3   | N1   | O1   | 119.4(10) | N7   | C24  | C23  | 117.6(10) |
| O3   | N1   | O2   | 123.6(11) | C21  | C22  | C23  | 119.8(9)  |
| O2   | N1   | O1   | 117.0(9)  | C27  | C26  | C25  | 120.2(8)  |
| N3   | C5   | C6   | 115.8(9)  | C26  | C27  | C28  | 119.6(8)  |
| N3   | C5   | C4   | 121.1(8)  | N6   | C19  | C20  | 122.8(8)  |
| C4   | C5   | C6   | 123.1(9)  | N6   | C23  | C24  | 113.5(12) |
| C30  | N8   | C29  | 130.4(10) | N6   | C23  | C22  | 121.5(8)  |
| C30  | N8   | C25  | 107.3(9)  | C22  | C23  | C24  | 125.0(13) |
| C29  | N8   | C25  | 122.3(8)  | N8   | C25  | C26  | 117.1(9)  |
| C2   | C3   | C4   | 118.9(8)  | C24  | C25  | N8   | 105.9(10) |
| C5   | C4   | C3   | 118.8(8)  | C24  | C25  | C26  | 137.0(11) |
| N8   | C30  | C31  | 123.5(9)  | C30  | N7   | Zn1  | 138.1(7)  |
| N7   | C30  | N8   | 111.1(9)  | C30  | N7   | C24  | 106.8(8)  |
| N7   | C30  | C31  | 125.3(10) | C24  | N7   | Zn1  | 113.3(6)  |
| N1   | O2   | Zn1  | 92.3(6)   | C31  | C32  | C33  | 120.1(9)  |
| C31  | C36  | C35  | 121.0(9)  | C3   | C2   | C1   | 119.9(8)  |
| C6   | N4   | Zn1  | 114.0(7)  | C34  | C33  | C32  | 117.7(9)  |
| C12  | N4   | Zn1  | 137.6(8)  | C16  | C15  | C14  | 119.8(10) |

|     |     |     |          |     |     |    |           |
|-----|-----|-----|----------|-----|-----|----|-----------|
| C12 | N4  | C6  | 108.1(8) | C11 | C10 | C9 | 121.6(10) |
| N3  | C1  | C2  | 121.0(8) | O4  | N2  | O5 | 111(3)    |
| C34 | C35 | C36 | 117.4(9) | O6  | N2  | O5 | 117(4)    |
| C36 | C31 | C30 | 118.7(9) | O6  | N2  | O4 | 130(5)    |
| C36 | C31 | C32 | 119.9(9) |     |     |    |           |

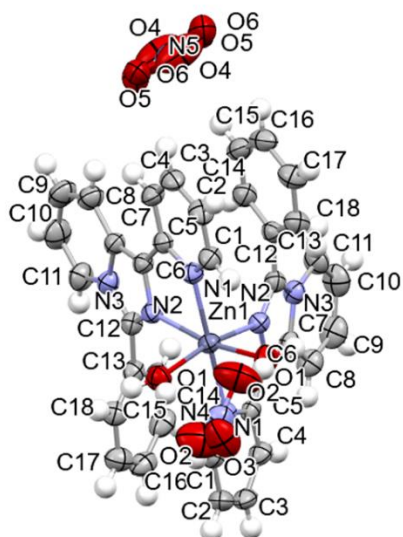

**Figure S15.** Asymmetric unit of  $[\text{Zn}(\text{L})_2(\text{H}_2\text{O})_2](\text{NO}_3)_2$ .

**Table S11.** Crystal data and structure refinement for  $[\text{Zn}(\text{L})_2(\text{H}_2\text{O})_2](\text{NO}_3)_2$ .

|                                               |                                                                    |
|-----------------------------------------------|--------------------------------------------------------------------|
| Empirical formula                             | $\text{C}_{36}\text{H}_{30}\text{N}_8\text{O}_8\text{Zn}$          |
| Formula weight                                | 768.05                                                             |
| Temperature/K                                 | 298.00                                                             |
| Crystal system                                | Monoclinic                                                         |
| Space group                                   | $\text{C2/c}$                                                      |
| $a/\text{\AA}$                                | 18.7794(9)                                                         |
| $b/\text{\AA}$                                | 11.4113(5)                                                         |
| $c/\text{\AA}$                                | 16.2186(7)                                                         |
| $\alpha/^\circ$                               | 90                                                                 |
| $\beta/^\circ$                                | 107.670(5)                                                         |
| $\gamma/^\circ$                               | 90                                                                 |
| Volume/ $\text{\AA}^3$                        | 3311.6(3)                                                          |
| $Z$                                           | 4                                                                  |
| $\rho_{\text{calc}}/\text{g cm}^{-3}$         | 1.540                                                              |
| $\mu/\text{mm}^{-1}$                          | 1.614                                                              |
| $F(000)$                                      | 1584.0                                                             |
| Crystal size/ $\text{mm}^3$                   | $0.15 \times 0.12 \times 0.1$                                      |
| Radiation                                     | $\text{CuK}\alpha$ ( $\lambda = 1.54184$ )                         |
| $2\theta$ range for data collection/ $^\circ$ | 9.192 to 135.004                                                   |
| Index ranges                                  | $-21 \leq h \leq 22$ , $-13 \leq k \leq 13$ , $-12 \leq l \leq 19$ |
| Reflections collected                         | 7167                                                               |

|                                                |                                                                  |
|------------------------------------------------|------------------------------------------------------------------|
| Independent reflections                        | 2756 [ $R_{\text{int}} = 0.0345$ , $R_{\text{sigma}} = 0.0386$ ] |
| Data/restraints/parameters                     | 2756/0/265                                                       |
| Goodness-of-fit on $F^2$                       | 1.051                                                            |
| Final R indexes [ $I \geq 2\sigma(I)$ ]        | $R_1 = 0.0459$ , $wR_2 = 0.1151$                                 |
| Final R indexes [all data]                     | $R_1 = 0.0577$ , $wR_2 = 0.1245$                                 |
| Largest diff. peak/hole / $e \text{ \AA}^{-3}$ | 0.58/-0.38                                                       |

**Table S12.** Bond lengths for [Zn(L)<sub>2</sub>(H<sub>2</sub>O)<sub>2</sub>](NO<sub>3</sub>)<sub>2</sub>.

| Atom                                                    | Atom            | Length/Å |  | Atom | Atom            | Length/Å  |
|---------------------------------------------------------|-----------------|----------|--|------|-----------------|-----------|
| Zn1                                                     | O1 <sup>1</sup> | 2.169(2) |  | C3   | C2              | 1.375(5)  |
| Zn1                                                     | O1              | 2.169(2) |  | C2   | C1              | 1.370(4)  |
| Zn1                                                     | N1              | 2.143(2) |  | C11  | C10             | 1.338(5)  |
| Zn1                                                     | N1 <sup>1</sup> | 2.143(2) |  | C14  | C15             | 1.385(5)  |
| Zn1                                                     | N2 <sup>1</sup> | 2.169(2) |  | C18  | C17             | 1.379(4)  |
| Zn1                                                     | N2              | 2.169(2) |  | C10  | C9              | 1.417(5)  |
| N3                                                      | C7              | 1.397(4) |  | C9   | C8              | 1.353(5)  |
| N3                                                      | C12             | 1.376(4) |  | C15  | C16             | 1.372(5)  |
| N3                                                      | C11             | 1.385(4) |  | C17  | C16             | 1.382(5)  |
| C5                                                      | N1              | 1.348(4) |  | N4   | O2 <sup>1</sup> | 1.216(4)  |
| C5                                                      | C4              | 1.384(4) |  | N4   | O2              | 1.216(4)  |
| C5                                                      | C6              | 1.461(4) |  | N4   | O3              | 1.224(5)  |
| N1                                                      | C1              | 1.334(4) |  | N5   | O6              | 1.342(6)  |
| C7                                                      | C6              | 1.383(4) |  | N5   | O6 <sup>2</sup> | 1.342(6)  |
| C7                                                      | C8              | 1.425(4) |  | N5   | O5 <sup>2</sup> | 1.236(8)  |
| N2                                                      | C12             | 1.318(4) |  | N5   | O5              | 1.236(8)  |
| N2                                                      | C6              | 1.374(3) |  | N5   | O4              | 1.130(9)  |
| C4                                                      | C3              | 1.381(4) |  | N5   | O4 <sup>2</sup> | 1.130(9)  |
| C13                                                     | C12             | 1.462(4) |  | O6   | O5              | 1.459(12) |
| C13                                                     | C14             | 1.393(4) |  | O6   | O4              | 1.258(15) |
| C13                                                     | C18             | 1.389(4) |  | O5   | O4 <sup>2</sup> | 1.044(11) |
| <sup>1</sup> 1-X,+Y,3/2-Z; <sup>2</sup> 1/2-X,1/2-Y,2-Z |                 |          |  |      |                 |           |

**Table S13.** Bond angles for [Zn(L)<sub>2</sub>(H<sub>2</sub>O)<sub>2</sub>](NO<sub>3</sub>)<sub>2</sub>.

| Atom            | Atom | Atom            | Angle/°    |  | Atom | Atom | Atom            | Angle/°  |
|-----------------|------|-----------------|------------|--|------|------|-----------------|----------|
| O1              | Zn1  | O1 <sup>1</sup> | 85.28(16)  |  | N2   | C6   | C5              | 118.3(2) |
| O1              | Zn1  | N2 <sup>1</sup> | 96.30(10)  |  | N2   | C6   | C7              | 109.1(2) |
| O1              | Zn1  | N2              | 168.24(9)  |  | N1   | C1   | C2              | 123.2(3) |
| O1 <sup>1</sup> | Zn1  | N2              | 96.30(10)  |  | C10  | C11  | N3              | 119.2(3) |
| O1 <sup>1</sup> | Zn1  | N2 <sup>1</sup> | 168.24(9)  |  | C15  | C14  | C13             | 119.9(3) |
| N1 <sup>1</sup> | Zn1  | O1              | 88.52(9)   |  | C17  | C18  | C13             | 120.2(3) |
| N1              | Zn1  | O1              | 91.71(9)   |  | C11  | C10  | C9              | 120.2(3) |
| N1 <sup>1</sup> | Zn1  | O1 <sup>1</sup> | 91.71(9)   |  | C8   | C9   | C10             | 121.4(3) |
| N1              | Zn1  | O1 <sup>1</sup> | 88.52(9)   |  | C9   | C8   | C7              | 119.3(3) |
| N1 <sup>1</sup> | Zn1  | N1              | 179.68(13) |  | C16  | C15  | C14             | 120.1(3) |
| N1 <sup>1</sup> | Zn1  | N2              | 103.05(9)  |  | C18  | C17  | C16             | 119.9(3) |
| N1 <sup>1</sup> | Zn1  | N2 <sup>1</sup> | 76.71(9)   |  | C15  | C16  | C17             | 120.5(3) |
| N1              | Zn1  | N2 <sup>1</sup> | 103.05(9)  |  | O2   | N4   | O2 <sup>1</sup> | 119.4(5) |
| N1              | Zn1  | N2              | 76.71(9)   |  | O2   | N4   | O3              | 120.3(3) |

|                                                         |     |     |            |  |                 |    |                 |           |
|---------------------------------------------------------|-----|-----|------------|--|-----------------|----|-----------------|-----------|
| N2 <sup>1</sup>                                         | Zn1 | N2  | 84.52(12)  |  | O2 <sup>1</sup> | N4 | O3              | 120.3(3)  |
| C12                                                     | N3  | C7  | 108.1(2)   |  | O6              | N5 | O6 <sup>2</sup> | 180.0     |
| C12                                                     | N3  | C11 | 129.4(3)   |  | O5              | N5 | O6              | 68.8(5)   |
| C11                                                     | N3  | C7  | 122.4(3)   |  | O5 <sup>2</sup> | N5 | O6 <sup>2</sup> | 68.8(5)   |
| N1                                                      | C5  | C4  | 120.9(3)   |  | O5              | N5 | O6 <sup>2</sup> | 111.2(5)  |
| N1                                                      | C5  | C6  | 114.5(2)   |  | O5 <sup>2</sup> | N5 | O6              | 111.2(5)  |
| C4                                                      | C5  | C6  | 124.6(3)   |  | O5 <sup>2</sup> | N5 | O5              | 180.0     |
| C5                                                      | N1  | Zn1 | 116.50(18) |  | O4              | N5 | O6              | 60.4(7)   |
| C1                                                      | N1  | Zn1 | 124.8(2)   |  | O4 <sup>2</sup> | N5 | O6              | 119.5(7)  |
| C1                                                      | N1  | C5  | 118.7(2)   |  | O4              | N5 | O6 <sup>2</sup> | 119.6(7)  |
| N3                                                      | C7  | C8  | 117.3(3)   |  | O4 <sup>2</sup> | N5 | O6 <sup>2</sup> | 60.5(7)   |
| C6                                                      | C7  | N3  | 105.0(2)   |  | O4 <sup>2</sup> | N5 | O5 <sup>2</sup> | 127.9(6)  |
| C6                                                      | C7  | C8  | 137.6(3)   |  | O4              | N5 | O5              | 127.9(6)  |
| C12                                                     | N2  | Zn1 | 137.02(19) |  | O4 <sup>2</sup> | N5 | O5              | 52.1(6)   |
| C12                                                     | N2  | C6  | 108.4(2)   |  | O4              | N5 | O5 <sup>2</sup> | 52.1(6)   |
| C6                                                      | N2  | Zn1 | 112.12(18) |  | O4 <sup>2</sup> | N5 | O4              | 180.0     |
| C3                                                      | C4  | C5  | 119.5(3)   |  | N5              | O6 | O5              | 52.2(3)   |
| C14                                                     | C13 | C12 | 120.5(3)   |  | O4              | O6 | N5              | 51.4(4)   |
| C18                                                     | C13 | C12 | 120.0(3)   |  | O4              | O6 | O5              | 102.7(6)  |
| C18                                                     | C13 | C14 | 119.5(3)   |  | N5              | O5 | O6              | 59.1(5)   |
| N3                                                      | C12 | C13 | 124.7(3)   |  | O4 <sup>2</sup> | O5 | N5              | 58.7(8)   |
| N2                                                      | C12 | N3  | 109.2(2)   |  | O4 <sup>2</sup> | O5 | O6              | 116.4(12) |
| N2                                                      | C12 | C13 | 126.1(3)   |  | N5              | O4 | O6              | 68.2(8)   |
| C2                                                      | C3  | C4  | 119.1(3)   |  | O5 <sup>2</sup> | O4 | N5              | 69.2(8)   |
| C1                                                      | C2  | C3  | 118.5(3)   |  | O5 <sup>2</sup> | O4 | O6              | 135.0(13) |
| C7                                                      | C6  | C5  | 132.5(3)   |  |                 |    |                 |           |
| <sup>1</sup> 1-X,+Y,3/2-Z; <sup>2</sup> 1/2-X,1/2-Y,2-Z |     |     |            |  |                 |    |                 |           |

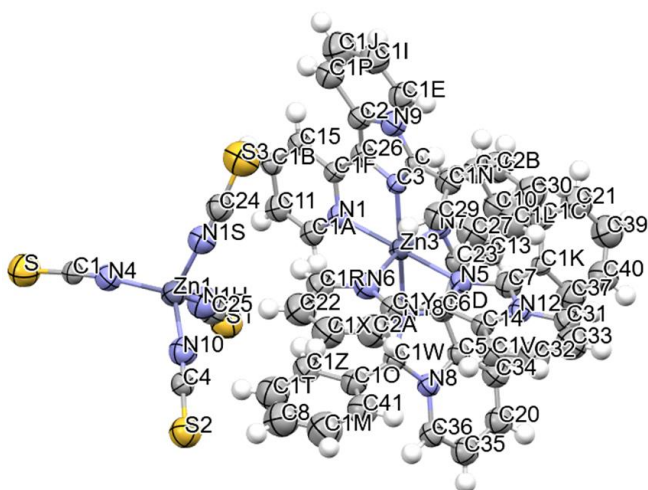

**Figure S16.** Asymmetric unit of [Zn(L)<sub>3</sub>][Zn(SCN)<sub>4</sub>].

**Table S14.** Crystal data and structure refinement for [Zn(L)<sub>3</sub>][Zn(SCN)<sub>4</sub>].

|                                             |                                                                                |
|---------------------------------------------|--------------------------------------------------------------------------------|
| Empirical formula                           | C <sub>58</sub> H <sub>39</sub> N <sub>13</sub> S <sub>4</sub> Zn <sub>2</sub> |
| Formula weight                              | 1177.00                                                                        |
| Temperature/K                               | 298.00                                                                         |
| Crystal system                              | Triclinic                                                                      |
| Space group                                 | P-1                                                                            |
| a/Å                                         | 14.003(5)                                                                      |
| b/Å                                         | 14.721(5)                                                                      |
| c/Å                                         | 15.586(5)                                                                      |
| α/°                                         | 72.84(3)                                                                       |
| β/°                                         | 84.61(3)                                                                       |
| γ/°                                         | 62.59(4)                                                                       |
| Volume/Å <sup>3</sup>                       | 2721.9(19)                                                                     |
| Z                                           | 2                                                                              |
| ρ <sub>calc</sub> /g/cm <sup>3</sup>        | 1.436                                                                          |
| μ/mm <sup>-1</sup>                          | 1.087                                                                          |
| F(000)                                      | 1204.0                                                                         |
| Crystal size/mm <sup>3</sup>                | 0.09 × 0.08 × 0.02                                                             |
| Radiation                                   | MoKα (λ = 0.71073)                                                             |
| 2θ range for data collection/°              | 4.168 to 58.984                                                                |
| Index ranges                                | -19 ≤ h ≤ 18, -20 ≤ k ≤ 17, -21 ≤ l ≤ 15                                       |
| Reflections collected                       | 25360                                                                          |
| Independent reflections                     | 12805 [R <sub>int</sub> = 0.4426, R <sub>sigma</sub> = 1.1851]                 |
| Data/restraints/parameters                  | 12805/462/695                                                                  |
| Goodness-of-fit on F <sup>2</sup>           | 0.853                                                                          |
| Final R indexes [I >= 2σ (I)]               | R <sub>1</sub> = 0.1414, wR <sub>2</sub> = 0.2906                              |
| Final R indexes [all data]                  | R <sub>1</sub> = 0.5490, wR <sub>2</sub> = 0.6456                              |
| Largest diff. peak/hole / e Å <sup>-3</sup> | 1.09/-0.81                                                                     |

**Table S15.** Bond lengths for [Zn(L)<sub>3</sub>][Zn(SCN)<sub>4</sub>].

| Atom | Atom | Length/Å  | Atom | Atom | Length/Å |
|------|------|-----------|------|------|----------|
| Zn3  | N1   | 2.157(17) | C16  | C17  | 1.36(3)  |
| Zn3  | C3   | 2.166(16) | N18  | C1W  | 1.30(2)  |
| Zn3  | N5   | 2.231(17) | N18  | C6   | 1.39(2)  |
| Zn3  | N6   | 2.12(2)   | C1C  | C1K  | 1.38(3)  |
| Zn3  | N7   | 2.160(17) | C1C  | C21  | 1.44(3)  |
| Zn3  | N18  | 2.326(18) | C36  | C35  | 1.32(3)  |
| Zn1  | N1H  | 1.99(2)   | C1D  | C1Y  | 1.51(3)  |
| Zn1  | N1S  | 1.99(2)   | C1E  | C1I  | 1.35(3)  |
| Zn1  | N4   | 1.958(18) | C37  | C40  | 1.34(3)  |
| Zn1  | N10  | 1.98(2)   | C37  | C1K  | 1.41(3)  |
| S2   | C4   | 1.63(3)   | C1F  | C26  | 1.44(3)  |



|     |     |         |  |     |     |         |
|-----|-----|---------|--|-----|-----|---------|
| S1  | C25 | 1.59(3) |  | C40 | C39 | 1.30(4) |
| S   | C1  | 1.59(2) |  | N1H | C25 | 1.16(3) |
| S3  | C24 | 1.62(3) |  | C35 | C20 | 1.41(3) |
| N1  | C1A | 1.35(2) |  | C1I | C1J | 1.46(3) |
| N1  | C1F | 1.32(2) |  | C1J | C1P | 1.37(3) |
| C2  | N9  | 1.46(3) |  | C1K | C7  | 1.42(3) |
| C2  | C1P | 1.52(3) |  | C1L | C27 | 1.26(3) |
| C2  | C26 | 1.30(3) |  | C1L | C30 | 1.36(4) |
| C3  | C   | 1.32(2) |  | C31 | C33 | 1.35(3) |
| C3  | C26 | 1.36(2) |  | C1M | C41 | 1.47(4) |
| C   | N9  | 1.35(2) |  | C1M | C8  | 1.37(4) |
| C   | C1N | 1.50(3) |  | C34 | C20 | 1.34(3) |
| N5  | C1D | 1.47(3) |  | C34 | C5  | 1.46(3) |
| N5  | C7  | 1.37(2) |  | C1N | C29 | 1.38(3) |
| N6  | C1R | 1.37(3) |  | C1N | C2B | 1.44(3) |
| N6  | C1Y | 1.36(3) |  | C32 | C1V | 1.26(3) |
| N7  | C17 | 1.39(3) |  | C32 | C33 | 1.36(3) |
| N7  | C23 | 1.38(2) |  | C1O | C1W | 1.59(3) |
| N8  | C36 | 1.42(3) |  | C1O | C1Z | 1.48(3) |
| N8  | C1W | 1.39(2) |  | C1O | C41 | 1.27(3) |
| N8  | C5  | 1.37(2) |  | C1R | C22 | 1.41(3) |
| N9  | C1E | 1.37(3) |  | N1S | C24 | 1.11(3) |
| C10 | C13 | 1.36(3) |  | C1T | C1Z | 1.41(4) |
| C10 | C16 | 1.40(3) |  | C1T | C8  | 1.24(4) |
| C11 | C1A | 1.38(3) |  | C1X | C22 | 1.35(4) |
| C11 | C1B | 1.36(3) |  | C1X | C2A | 1.33(3) |
| N12 | C14 | 1.36(2) |  | C1Y | C2A | 1.36(3) |
| N12 | C31 | 1.44(2) |  | C21 | C39 | 1.38(3) |
| N12 | C7  | 1.42(3) |  | C27 | C29 | 1.36(3) |
| C13 | C23 | 1.40(3) |  | C2B | C30 | 1.58(4) |
| C14 | C1D | 1.39(3) |  | C23 | C6  | 1.52(3) |
| C14 | C1V | 1.46(3) |  | N4  | C1  | 1.19(2) |
| C15 | C1B | 1.36(2) |  | C4  | N10 | 1.11(3) |
| C15 | C1F | 1.44(3) |  | C6  | C5  | 1.37(3) |

**Table S16.** Bond angles for [Zn(L)<sub>3</sub>][Zn(SCN)<sub>4</sub>].

| Atom | Atom | Atom | Angle/°  |  | Atom | Atom | Atom | Angle/°   |
|------|------|------|----------|--|------|------|------|-----------|
| N1   | Zn3  | C3   | 76.4(6)  |  | C1I  | C1E  | N9   | 115(2)    |
| N1   | Zn3  | N5   | 174.3(6) |  | C40  | C37  | C1K  | 119(3)    |
| N1   | Zn3  | N7   | 90.2(6)  |  | N1   | C1F  | C15  | 120.1(17) |
| N1   | Zn3  | N18  | 99.9(6)  |  | N1   | C1F  | C26  | 118.4(19) |

|     |     |     |           |  |     |     |     |           |
|-----|-----|-----|-----------|--|-----|-----|-----|-----------|
| C3  | Zn3 | N5  | 99.9(6)   |  | C26 | C1F | C15 | 121.2(19) |
| C3  | Zn3 | N18 | 174.3(7)  |  | C39 | C40 | C37 | 126(3)    |
| N5  | Zn3 | N18 | 84.1(6)   |  | C25 | N1H | Zn1 | 166(2)    |
| N6  | Zn3 | N1  | 96.9(7)   |  | C36 | C35 | C20 | 119(3)    |
| N6  | Zn3 | C3  | 92.5(7)   |  | C1E | C1I | C1J | 120(3)    |
| N6  | Zn3 | N5  | 78.8(7)   |  | C1P | C1J | C1I | 127(3)    |
| N6  | Zn3 | N7  | 166.9(7)  |  | C1C | C1K | C37 | 121(2)    |
| N6  | Zn3 | N18 | 92.3(7)   |  | C1C | C1K | C7  | 119(2)    |
| N7  | Zn3 | C3  | 99.9(6)   |  | C37 | C1K | C7  | 120(2)    |
| N7  | Zn3 | N5  | 94.8(6)   |  | C27 | C1L | C30 | 122(3)    |
| N7  | Zn3 | N18 | 75.6(6)   |  | C33 | C31 | N12 | 117(2)    |
| N1H | Zn1 | N1S | 111.3(9)  |  | C8  | C1M | C41 | 112(3)    |
| N4  | Zn1 | N1H | 107.2(8)  |  | C20 | C34 | C5  | 118(2)    |
| N4  | Zn1 | N1S | 106.9(8)  |  | C29 | C1N | C   | 123(2)    |
| N4  | Zn1 | N10 | 114.2(8)  |  | C29 | C1N | C2B | 123(2)    |
| N10 | Zn1 | N1H | 107.3(9)  |  | C2B | C1N | C   | 114(2)    |
| N10 | Zn1 | N1S | 109.9(8)  |  | C1V | C32 | C33 | 123(3)    |
| C1A | N1  | Zn3 | 126.1(15) |  | C1Z | C1O | C1W | 114(2)    |
| C1F | N1  | Zn3 | 113.7(13) |  | C41 | C1O | C1W | 121(2)    |
| C1F | N1  | C1A | 118.6(19) |  | C41 | C1O | C1Z | 125(2)    |
| N9  | C2  | C1P | 112.1(19) |  | C1J | C1P | C2  | 115(2)    |
| C26 | C2  | N9  | 108(2)    |  | N6  | C1R | C22 | 122(3)    |
| C26 | C2  | C1P | 140(2)    |  | C24 | N1S | Zn1 | 172(2)    |
| C   | C3  | Zn3 | 138.8(14) |  | C8  | C1T | C1Z | 123(3)    |
| C   | C3  | C26 | 107.0(16) |  | C32 | C1V | C14 | 120(2)    |
| C26 | C3  | Zn3 | 113.8(12) |  | N8  | C1W | C1O | 123(2)    |
| C3  | C   | N9  | 112.1(17) |  | N18 | C1W | N8  | 109.6(18) |
| C3  | C   | C1N | 130.3(18) |  | N18 | C1W | C1O | 127(2)    |
| N9  | C   | C1N | 116.9(17) |  | C2A | C1X | C22 | 118(3)    |
| C1D | N5  | Zn3 | 108.5(12) |  | N6  | C1Y | C1D | 112(2)    |
| C7  | N5  | Zn3 | 141.5(16) |  | N6  | C1Y | C2A | 124(2)    |
| C7  | N5  | C1D | 109.9(18) |  | C2A | C1Y | C1D | 124(2)    |
| C1R | N6  | Zn3 | 125.6(18) |  | C1T | C1Z | C1O | 111(3)    |
| C1Y | N6  | Zn3 | 120.3(15) |  | C34 | C20 | C35 | 124(3)    |
| C1Y | N6  | C1R | 114(2)    |  | C39 | C21 | C1C | 125(3)    |
| C17 | N7  | Zn3 | 122.3(14) |  | C1X | C22 | C1R | 120(3)    |
| C23 | N7  | Zn3 | 117.6(15) |  | N1S | C24 | S3  | 174(3)    |
| C23 | N7  | C17 | 120.1(19) |  | N1H | C25 | S1  | 177(2)    |
| C1W | N8  | C36 | 127.3(19) |  | C1L | C27 | C29 | 125(3)    |
| C5  | N8  | C36 | 125.1(19) |  | C27 | C29 | C1N | 120(3)    |
| C5  | N8  | C1W | 107.6(18) |  | C1X | C2A | C1Y | 122(3)    |
| C   | N9  | C2  | 102.8(17) |  | C1N | C2B | C30 | 111(2)    |

|     |     |     |           |     |     |     |           |
|-----|-----|-----|-----------|-----|-----|-----|-----------|
| C   | N9  | C1E | 126(2)    | N7  | C23 | C13 | 123(2)    |
| C1E | N9  | C2  | 131(2)    | N7  | C23 | C6  | 113.4(19) |
| C13 | C10 | C16 | 126(2)    | C13 | C23 | C6  | 123(2)    |
| C1B | C11 | C1A | 116(2)    | C2  | C26 | C3  | 110.5(19) |
| C14 | N12 | C31 | 121(2)    | C2  | C26 | C1F | 134(2)    |
| C14 | N12 | C7  | 114.5(18) | C3  | C26 | C1F | 115.9(19) |
| C7  | N12 | C31 | 124.9(19) | C1L | C30 | C2B | 120(3)    |
| C10 | C13 | C23 | 113(2)    | C31 | C33 | C32 | 122(3)    |
| N12 | C14 | C1D | 106(2)    | C40 | C39 | C21 | 115(3)    |
| N12 | C14 | C1V | 116.9(19) | C1  | N4  | Zn1 | 158.6(17) |
| C1D | C14 | C1V | 137(2)    | N4  | C1  | S   | 176(2)    |
| C1B | C15 | C1F | 118(2)    | N10 | C4  | S2  | 176(2)    |
| C17 | C16 | C10 | 119(3)    | C4  | N10 | Zn1 | 172(2)    |
| C16 | C17 | N7  | 118(2)    | N18 | C6  | C23 | 118.2(19) |
| C1W | N18 | Zn3 | 137.3(15) | C5  | C6  | N18 | 109(2)    |
| C1W | N18 | C6  | 107.9(18) | C5  | C6  | C23 | 133(2)    |
| C6  | N18 | Zn3 | 106.8(14) | N8  | C5  | C34 | 116(2)    |
| N1  | C1A | C11 | 125(2)    | C6  | C5  | N8  | 106.1(19) |
| C11 | C1B | C15 | 123(2)    | C6  | C5  | C34 | 138(2)    |
| C1K | C1C | C21 | 113(2)    | N5  | C7  | N12 | 103(2)    |
| C35 | C36 | N8  | 117(2)    | N5  | C7  | C1K | 131(2)    |
| N5  | C1D | C1Y | 119.8(19) | N12 | C7  | C1K | 125.5(19) |
| C14 | C1D | N5  | 106.7(17) | C1O | C41 | C1M | 121(3)    |
| C14 | C1D | C1Y | 133(2)    | C1T | C8  | C1M | 129(4)    |

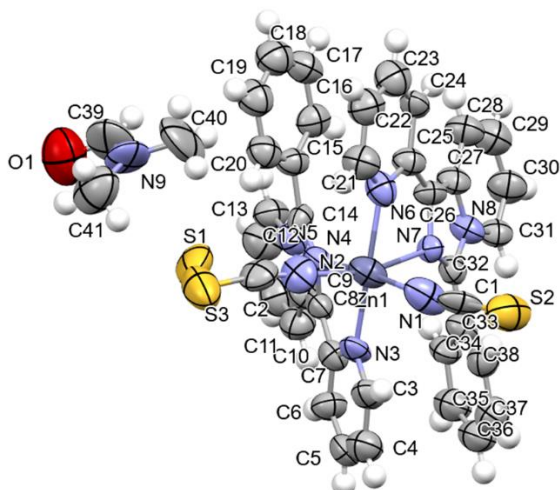

**Figure S17.** Asymmetric unit of  $[\text{Zn}(\text{L})_2(\text{SCN})_2] \cdot \text{DMF}$ .

**Table S17.** Crystal data and structure refinement for  $[\text{Zn}(\text{L})_2(\text{SCN})_2] \cdot \text{DMF}$ .

|                   |                                                            |  |
|-------------------|------------------------------------------------------------|--|
| Empirical formula | $\text{C}_{41}\text{H}_{33}\text{N}_9\text{OS}_2\text{Zn}$ |  |
| Formula weight    | 797.25                                                     |  |

|                                                |                                                               |  |
|------------------------------------------------|---------------------------------------------------------------|--|
| Temperature/K                                  | 298.00                                                        |  |
| Crystal system                                 | triclinic                                                     |  |
| Space group                                    | P-1                                                           |  |
| a/Å                                            | 11.077(3)                                                     |  |
| b/Å                                            | 11.531(4)                                                     |  |
| c/Å                                            | 15.823(3)                                                     |  |
| $\alpha/^\circ$                                | 94.80(2)                                                      |  |
| $\beta/^\circ$                                 | 107.74(2)                                                     |  |
| $\gamma/^\circ$                                | 95.65(3)                                                      |  |
| Volume/Å <sup>3</sup>                          | 1901.8(10)                                                    |  |
| Z                                              | 2                                                             |  |
| $\rho_{\text{calc}}/\text{g/cm}^3$             | 1.392                                                         |  |
| $\mu/\text{mm}^{-1}$                           | 2.292                                                         |  |
| F(000)                                         | 824.0                                                         |  |
| Crystal size/mm <sup>3</sup>                   | 0.11 × 0.1 × 0.08                                             |  |
| Radiation                                      | CuK $\alpha$ ( $\lambda$ = 1.54184)                           |  |
| 2 $\Theta$ range for data collection/ $^\circ$ | 7.76 to 135.944                                               |  |
| Index ranges                                   | -9 ≤ h ≤ 13, -8 ≤ k ≤ 13, -12 ≤ l ≤ 19                        |  |
| Reflections collected                          | 6929                                                          |  |
| Independent reflections                        | 6929 [R <sub>int</sub> = 0.0864, R <sub>sigma</sub> = 0.1382] |  |
| Data/restraints/parameters                     | 6929/246/498                                                  |  |
| Goodness-of-fit on F <sup>2</sup>              | 1.027                                                         |  |
| Final R indexes [I ≥ 2 $\sigma$ (I)]           | R <sub>1</sub> = 0.0653, wR <sub>2</sub> = 0.1355             |  |
| Final R indexes [all data]                     | R <sub>1</sub> = 0.1247, wR <sub>2</sub> = 0.1820             |  |
| Largest diff. peak/hole / e Å <sup>-3</sup>    | 0.24/-0.39                                                    |  |

**Table S18.** Bond lengths for [Zn(L)<sub>2</sub>(SCN)<sub>2</sub>] $\cdot$ DMF.

| Atom | Atom | Length/Å  |  | Atom | Atom | Length/Å  |
|------|------|-----------|--|------|------|-----------|
| Zn1  | N7   | 2.285(10) |  | C35  | C36  | 1.372(16) |
| Zn1  | N4   | 2.312(11) |  | C6   | C7   | 1.391(15) |
| Zn1  | N1   | 2.070(12) |  | C36  | C37  | 1.381(15) |
| Zn1  | N3   | 2.108(10) |  | C7   | C8   | 1.435(16) |
| Zn1  | N2   | 2.098(13) |  | C16  | C17  | 1.402(15) |
| Zn1  | N6   | 2.118(11) |  | C16  | C15  | 1.374(15) |
| S2   | C1   | 1.618(16) |  | C14  | C15  | 1.458(16) |
| S3   | C2   | 1.68(2)   |  | C9   | C8   | 1.389(15) |
| N7   | C32  | 1.325(13) |  | C9   | C10  | 1.435(15) |
| N7   | C26  | 1.391(13) |  | C20  | C15  | 1.370(15) |
| N5   | C14  | 1.409(13) |  | C20  | C19  | 1.409(16) |
| N5   | C9   | 1.383(14) |  | C11  | C12  | 1.412(17) |
| N5   | C13  | 1.374(13) |  | C11  | C10  | 1.340(15) |
| N4   | C14  | 1.323(13) |  | C12  | C13  | 1.369(15) |
| N4   | C8   | 1.371(14) |  | C24  | C25  | 1.427(15) |
| N1   | C1   | 1.145(15) |  | C24  | C23  | 1.391(15) |
| N3   | C3   | 1.323(13) |  | C25  | N6   | 1.366(14) |
| N3   | C7   | 1.365(14) |  | N6   | C21  | 1.331(14) |
| N2   | C2   | 1.101(17) |  | N8   | C31  | 1.405(14) |
| C34  | C33  | 1.411(14) |  | C31  | C30  | 1.346(14) |
| C34  | C35  | 1.395(15) |  | C30  | C29  | 1.404(16) |
| C38  | C33  | 1.380(15) |  | C28  | C29  | 1.374(16) |
| C38  | C37  | 1.393(15) |  | C21  | C22  | 1.392(16) |
| C32  | C33  | 1.486(16) |  | C23  | C22  | 1.360(16) |
| C32  | N8   | 1.384(14) |  | C17  | C18  | 1.349(16) |
| C26  | C27  | 1.414(16) |  | C18  | C19  | 1.343(17) |
| C26  | C25  | 1.411(15) |  | C39  | O1   | 1.28(2)   |
| C27  | N8   | 1.368(14) |  | C39  | N9   | 1.32(2)   |
| C27  | C28  | 1.448(15) |  | C41  | N9   | 1.397(17) |
| C3   | C4   | 1.388(15) |  | C40  | N9   | 1.495(19) |
| C5   | C6   | 1.360(14) |  | C2   | S1   | 1.63(4)   |
| C5   | C4   | 1.382(15) |  |      |      |           |

**Table S19.** Bond angles for [Zn(L)<sub>2</sub>(SCN)<sub>2</sub>] $\cdot$ DMF.

| Atom | Atom | Atom | Angle/°  |  | Atom | Atom | Atom | Angle/°   |
|------|------|------|----------|--|------|------|------|-----------|
| N7   | Zn1  | N4   | 76.4(3)  |  | N3   | C7   | C8   | 114.1(14) |
| N1   | Zn1  | N7   | 93.7(5)  |  | C6   | C7   | C8   | 124.6(15) |
| N1   | Zn1  | N4   | 164.7(5) |  | C5   | C4   | C3   | 115.8(14) |
| N1   | Zn1  | N3   | 95.1(5)  |  | C15  | C16  | C17  | 119.2(15) |
| N1   | Zn1  | N2   | 99.7(6)  |  | N5   | C14  | C15  | 122.1(14) |

|     |     |     |           |  |     |     |     |           |
|-----|-----|-----|-----------|--|-----|-----|-----|-----------|
| N1  | Zn1 | N6  | 94.8(4)   |  | N4  | C14 | N5  | 106.5(13) |
| N3  | Zn1 | N7  | 94.2(4)   |  | N4  | C14 | C15 | 131.4(14) |
| N3  | Zn1 | N4  | 74.3(5)   |  | N5  | C9  | C8  | 104.5(13) |
| N3  | Zn1 | N6  | 166.0(5)  |  | N5  | C9  | C10 | 119.2(14) |
| N2  | Zn1 | N7  | 163.5(5)  |  | C8  | C9  | C10 | 136.3(16) |
| N2  | Zn1 | N4  | 92.2(5)   |  | C15 | C20 | C19 | 117.8(15) |
| N2  | Zn1 | N3  | 94.2(5)   |  | N4  | C8  | C7  | 119.0(14) |
| N2  | Zn1 | N6  | 93.9(5)   |  | N4  | C8  | C9  | 109.3(14) |
| N6  | Zn1 | N7  | 75.3(5)   |  | C9  | C8  | C7  | 131.5(16) |
| N6  | Zn1 | N4  | 93.9(4)   |  | C10 | C11 | C12 | 123.8(15) |
| C32 | N7  | Zn1 | 138.3(10) |  | C13 | C12 | C11 | 117.8(15) |
| C32 | N7  | C26 | 108.6(12) |  | C12 | C13 | N5  | 120.5(14) |
| C26 | N7  | Zn1 | 108.5(9)  |  | C11 | C10 | C9  | 117.2(15) |
| C9  | N5  | C14 | 109.7(12) |  | C23 | C24 | C25 | 119.1(14) |
| C13 | N5  | C14 | 128.6(14) |  | C26 | C25 | C24 | 124.7(15) |
| C13 | N5  | C9  | 121.1(13) |  | N6  | C25 | C26 | 116.1(13) |
| C14 | N4  | Zn1 | 137.4(10) |  | N6  | C25 | C24 | 119.2(13) |
| C14 | N4  | C8  | 110.0(12) |  | C25 | N6  | Zn1 | 117.5(10) |
| C8  | N4  | Zn1 | 108.8(10) |  | C21 | N6  | Zn1 | 122.3(11) |
| C1  | N1  | Zn1 | 170.8(13) |  | C21 | N6  | C25 | 120.1(13) |
| C3  | N3  | Zn1 | 122.9(11) |  | C32 | N8  | C31 | 128.2(14) |
| C3  | N3  | C7  | 117.3(13) |  | C27 | N8  | C32 | 109.0(13) |
| C7  | N3  | Zn1 | 119.8(10) |  | C27 | N8  | C31 | 122.5(13) |
| C2  | N2  | Zn1 | 168(2)    |  | C30 | C31 | N8  | 117.6(13) |
| C35 | C34 | C33 | 119.1(13) |  | C31 | C30 | C29 | 120.4(15) |
| C33 | C38 | C37 | 118.8(14) |  | C29 | C28 | C27 | 113.9(14) |
| N7  | C32 | C33 | 127.0(14) |  | C28 | C29 | C30 | 124.7(15) |
| N7  | C32 | N8  | 109.1(13) |  | N6  | C21 | C22 | 122.4(14) |
| N8  | C32 | C33 | 123.9(14) |  | C22 | C23 | C24 | 119.9(15) |
| N7  | C26 | C27 | 107.5(13) |  | C23 | C22 | C21 | 119.2(16) |
| N7  | C26 | C25 | 118.8(13) |  | N1  | C1  | S2  | 178.6(16) |
| C25 | C26 | C27 | 133.7(15) |  | C18 | C17 | C16 | 119.3(15) |
| C26 | C27 | C28 | 133.3(15) |  | C16 | C15 | C14 | 123.5(15) |
| N8  | C27 | C26 | 105.9(13) |  | C20 | C15 | C16 | 121.3(15) |
| N8  | C27 | C28 | 120.8(14) |  | C20 | C15 | C14 | 115.1(15) |
| C34 | C33 | C32 | 119.5(13) |  | C36 | C37 | C38 | 120.1(14) |
| C38 | C33 | C34 | 120.9(14) |  | C19 | C18 | C17 | 121.7(16) |
| C38 | C33 | C32 | 119.5(13) |  | C18 | C19 | C20 | 120.7(16) |
| N3  | C3  | C4  | 125.3(14) |  | O1  | C39 | N9  | 118(2)    |
| C6  | C5  | C4  | 121.2(15) |  | C39 | N9  | C41 | 122.7(19) |
| C36 | C35 | C34 | 119.2(14) |  | C39 | N9  | C40 | 119.1(19) |
| C5  | C6  | C7  | 119.1(15) |  | C41 | N9  | C40 | 118.2(17) |

|     |     |     |           |    |    |    |        |
|-----|-----|-----|-----------|----|----|----|--------|
| C35 | C36 | C37 | 121.7(15) | N2 | C2 | S3 | 168(2) |
| N3  | C7  | C6  | 121.2(14) | N2 | C2 | S1 | 151(2) |

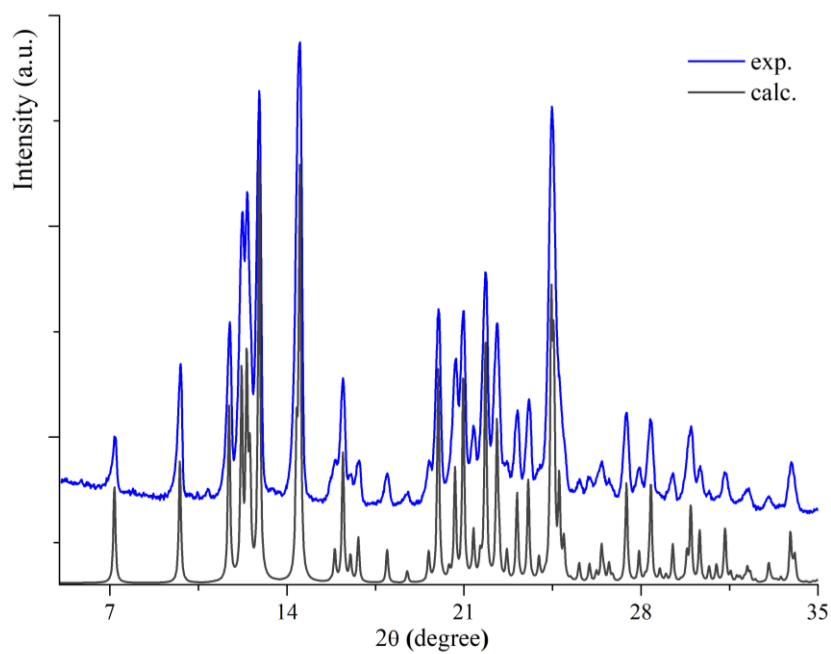

**Figure S18.** Experimental and calculated PXRD pattern of  $[\text{Zn}(\text{L})(\text{NO}_3)_2]$ .

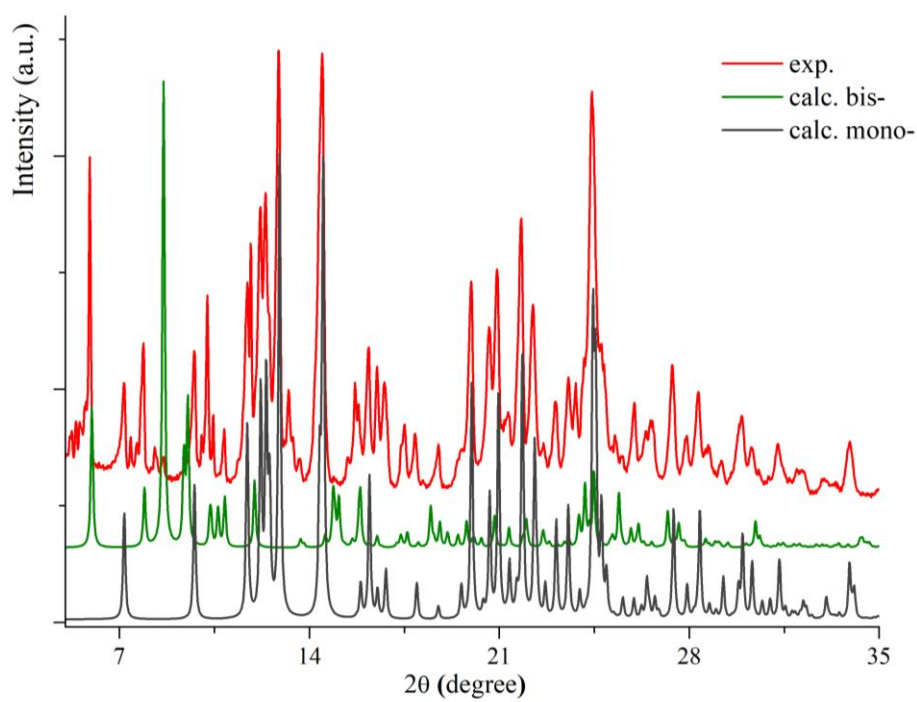

**Figure S19.** Experimental pattern of direct reaction between  $\text{Zn}(\text{NO}_3)_2$  and **L**, and calculated PXRD patterns of  $[\text{Zn}(\text{L})_2(\text{NO}_3)](\text{NO}_3) \cdot \text{H}_2\text{O}$  and  $[\text{Zn}(\text{L})(\text{NO}_3)_2]$ .

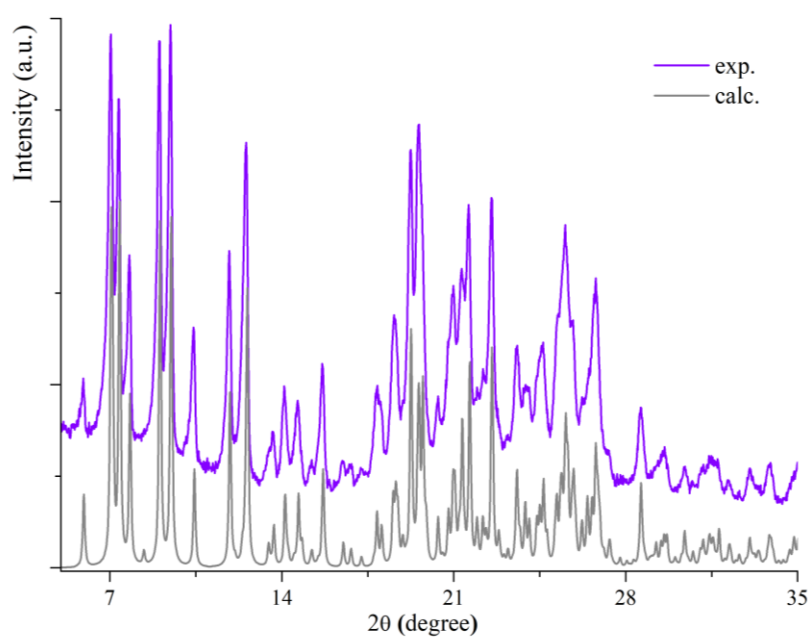

**Figure S20.** Experimental and calculated PXRD pattern of  $[\text{Zn}(\text{L})_3][\text{Zn}(\text{SCN})_4]$ .
